# Supplementary material
Source: MDPI journal article supplement (https://www.mdpi.com/2075-163X/9/4/221)
Supplement: s1 [file s1]

 
data_shelx
 
_audit_creation_method            SHELXL-2014/6
_chemical_name_systematic         ?
_chemical_name_common             ?
_chemical_melting_point           ?
_chemical_formula_moiety          ?
_chemical_formula_sum
 'Al Cl H6 Mg2 O7' 
_chemical_formula_weight          229.10

loop_
 _atom_type_symbol
 _atom_type_description
 _atom_type_scat_dispersion_real
 _atom_type_scat_dispersion_imag
 _atom_type_scat_source
 'Al'  'Al'   0.0645   0.0514
 'International Tables Vol C Tables 4.2.6.8 and 6.1.1.4'
 'Mg'  'Mg'   0.0486   0.0363
 'International Tables Vol C Tables 4.2.6.8 and 6.1.1.4'
 'O'  'O'   0.0106   0.0060
 'International Tables Vol C Tables 4.2.6.8 and 6.1.1.4'
 'H'  'H'   0.0000   0.0000
 'International Tables Vol C Tables 4.2.6.8 and 6.1.1.4'
 'Cl'  'Cl'   0.1484   0.1585
 'International Tables Vol C Tables 4.2.6.8 and 6.1.1.4'
 
_space_group_crystal_system       hexagonal
_space_group_IT_number            193
_space_group_name_H-M_alt         'P 63/m c m'
_space_group_name_Hall            '-P 6c 2'
 
_shelx_space_group_comment
;
The symmetry employed for this shelxl refinement is uniquely defined
by the following loop, which should always be used as a source of
symmetry information in preference to the above space-group names.
They are only intended as comments.
;
 
loop_
 _space_group_symop_operation_xyz
 'x, y, z'
 'x-y, x, z+1/2'
 '-y, x-y, z'
 '-x, -y, z+1/2'
 '-x+y, -x, z'
 'y, -x+y, z+1/2'
 '-y, -x, -z'
 'x-y, -y, -z+1/2'
 'x, x-y, -z'
 'y, x, -z+1/2'
 '-x+y, y, -z'
 '-x, -x+y, -z+1/2'
 '-x, -y, -z'
 '-x+y, -x, -z-1/2'
 'y, -x+y, -z'
 'x, y, -z-1/2'
 'x-y, x, -z'
 '-y, x-y, -z-1/2'
 'y, x, z'
 '-x+y, y, z-1/2'
 '-x, -x+y, z'
 '-y, -x, z-1/2'
 'x-y, -y, z'
 'x, x-y, z-1/2'
 
_cell_length_a                    5.268(3)
_cell_length_b                    5.268(3)
_cell_length_c                    15.297(8)
_cell_angle_alpha                 90
_cell_angle_beta                  90
_cell_angle_gamma                 120
_cell_volume                      367.6(5)
_cell_formula_units_Z             2
_cell_measurement_temperature     293(2)
_cell_measurement_reflns_used     805
_cell_measurement_theta_min       4.2780
_cell_measurement_theta_max       36.1770
 
_exptl_crystal_description        plate
_exptl_crystal_colour             yellow-brown
_exptl_crystal_density_meas       ?
_exptl_crystal_density_method     ?
_exptl_crystal_density_diffrn     2.070          
_exptl_crystal_F_000              232
_exptl_transmission_factor_min    ?
_exptl_transmission_factor_max    ?
_exptl_crystal_size_max           0.1
_exptl_crystal_size_mid           0.1
_exptl_crystal_size_min           0.03
_exptl_absorpt_coefficient_mu     0.799
_shelx_estimated_absorpt_T_min    ?
_shelx_estimated_absorpt_T_max    ?
_exptl_absorpt_correction_type    empirical
_exptl_absorpt_correction_T_min   0.55350
_exptl_absorpt_correction_T_max   1.0000
_exptl_absorpt_process_details    'SADABS'
_exptl_absorpt_special_details    ?
_diffrn_ambient_temperature       293(2)
_diffrn_radiation_wavelength      0.71073
_diffrn_radiation_type            MoK\a
_diffrn_source                    'fine-focused sealed tube'
_diffrn_measurement_device_type   'Bruker Kappa Apex Duo'
_diffrn_measurement_method        ?
_diffrn_detector_area_resol_mean  ?
_diffrn_reflns_number             2133
_diffrn_reflns_av_unetI/netI      0.0537
_diffrn_reflns_av_R_equivalents   0.0701
_diffrn_reflns_limit_h_min        -8
_diffrn_reflns_limit_h_max        6
_diffrn_reflns_limit_k_min        -7
_diffrn_reflns_limit_k_max        5
_diffrn_reflns_limit_l_min        -23
_diffrn_reflns_limit_l_max        19
_diffrn_reflns_theta_min          2.663
_diffrn_reflns_theta_max          33.353
_diffrn_reflns_theta_full         25.242
_diffrn_measured_fraction_theta_max   0.955
_diffrn_measured_fraction_theta_full  1.000
_diffrn_reflns_Laue_measured_fraction_max    0.955
_diffrn_reflns_Laue_measured_fraction_full   1.000
_diffrn_reflns_point_group_measured_fraction_max   0.955
_diffrn_reflns_point_group_measured_fraction_full  1.000
_reflns_number_total              277
_reflns_number_gt                 152
_reflns_threshold_expression      'I > 2\s(I)'
_reflns_Friedel_coverage          0.000
_reflns_Friedel_fraction_max      .
_reflns_Friedel_fraction_full     .
 
_reflns_special_details
;
 Reflections were merged by SHELXL according to the crystal
 class for the calculation of statistics and refinement.
 
 _reflns_Friedel_fraction is defined as the number of unique
 Friedel pairs measured divided by the number that would be
 possible theoretically, ignoring centric projections and
 systematic absences.
;
 
_computing_data_collection        ?
_computing_cell_refinement        ?
_computing_data_reduction         ?
_computing_structure_solution     ?
_computing_structure_refinement 'SHELXL-2014/6 (Sheldrick, 2014)'
_computing_molecular_graphics     ?
_computing_publication_material   ?
_refine_special_details           ?
_refine_ls_structure_factor_coef  Fsqd
_refine_ls_matrix_type            full
_refine_ls_weighting_scheme       calc
_refine_ls_weighting_details
'w=1/[\s^2^(Fo^2^)+(0.1178P)^2^] where P=(Fo^2^+2Fc^2^)/3'
_atom_sites_solution_primary      ?
_atom_sites_solution_secondary    ?
_atom_sites_solution_hydrogens    difmap
_refine_ls_hydrogen_treatment     refxyz
_refine_ls_extinction_method      none
_refine_ls_extinction_coef        .
_refine_ls_number_reflns          277
_refine_ls_number_parameters      32
_refine_ls_number_restraints      0
_refine_ls_R_factor_all           0.1205
_refine_ls_R_factor_gt            0.0824
_refine_ls_wR_factor_ref          0.2190
_refine_ls_wR_factor_gt           0.1963
_refine_ls_goodness_of_fit_ref    1.095
_refine_ls_restrained_S_all       1.095
_refine_ls_shift/su_max           0.000
_refine_ls_shift/su_mean          0.000
 
loop_
 _atom_site_label
 _atom_site_type_symbol
 _atom_site_fract_x
 _atom_site_fract_y
 _atom_site_fract_z
 _atom_site_U_iso_or_equiv
 _atom_site_adp_type
 _atom_site_occupancy
 _atom_site_site_symmetry_order  
 _atom_site_calc_flag
 _atom_site_refinement_flags_posn
 _atom_site_refinement_flags_adp
 _atom_site_refinement_flags_occupancy
 _atom_site_disorder_assembly
 _atom_site_disorder_group
Mg1 Mg 0.3333 0.6667 0.0000 0.0167(8) Uani 1 6 d S T P . .
Al1 Al 0.0000 0.0000 0.0000 0.0161(9) Uani 1 12 d S T P . .
O1 O 0.3094(5) 0.3094(5) 0.0644(2) 0.0154(8) Uani 1 2 d S T P . .
H1 H 0.294(8) 0.294(8) 0.124(4) 0.020 Uiso 1 2 d S U P . .
Cl1 Cl 0.739(8) 0.338(12) 0.2500 0.039(12) Uiso 0.044(6) 2 d S . P . .
Cl2 Cl 0.0000 0.054(5) 0.2500 0.030(8) Uiso 0.080(5) 4 d S . P . .
Cl31 Cl 0.335(5) 0.089(5) 0.2500 0.039(9) Uiso 0.077(12) 2 d S . P . .
Cl32 Cl 0.39(2) 0.0000 0.2500 0.06(3) Uiso 0.05(2) 4 d S . P . .
O2W O 0.408(6) 0.319(6) 0.2500 0.070(17) Uiso 0.18(2) 2 d S . P . .
 
loop_
 _atom_site_aniso_label
 _atom_site_aniso_U_11
 _atom_site_aniso_U_22
 _atom_site_aniso_U_33
 _atom_site_aniso_U_23
 _atom_site_aniso_U_13
 _atom_site_aniso_U_12
Mg1 0.0092(9) 0.0092(9) 0.0317(15) 0.000 0.000 0.0046(4)
Al1 0.0086(10) 0.0086(10) 0.031(2) 0.000 0.000 0.0043(5)
O1 0.0091(11) 0.0091(11) 0.0269(16) -0.0009(10) -0.0009(10) 0.0037(10)
 
_geom_special_details
;
 All esds (except the esd in the dihedral angle between two l.s. planes)
 are estimated using the full covariance matrix.  The cell esds are taken
 into account individually in the estimation of esds in distances, angles
 and torsion angles; correlations between esds in cell parameters are only
 used when they are defined by crystal symmetry.  An approximate (isotropic)
 treatment of cell esds is used for estimating esds involving l.s. planes.
;
 
loop_
 _geom_bond_atom_site_label_1
 _geom_bond_atom_site_label_2
 _geom_bond_distance
 _geom_bond_site_symmetry_2
 _geom_bond_publ_flag
Mg1 O1 2.071(2) 17 ?
Mg1 O1 2.071(2) 3_665 ?
Mg1 O1 2.071(2) 5_565 ?
Mg1 O1 2.071(2) 15_565 ?
Mg1 O1 2.071(2) 13_665 ?
Mg1 O1 2.071(2) . ?
Mg1 Mg1 3.0415(17) 13_665 ?
Mg1 Al1 3.0415(17) 1_565 ?
Mg1 Al1 3.0415(17) . ?
Mg1 Al1 3.0415(17) 1_665 ?
Mg1 Mg1 3.0415(17) 13_675 ?
Mg1 Mg1 3.0415(17) 13_565 ?
Al1 O1 1.904(3) . ?
Al1 O1 1.904(3) 13 ?
Al1 O1 1.904(3) 17 ?
Al1 O1 1.904(3) 5 ?
Al1 O1 1.904(3) 15 ?
Al1 O1 1.904(3) 3 ?
Al1 Mg1 3.0415(17) 1_445 ?
Al1 Mg1 3.0415(17) 13_665 ?
Al1 Mg1 3.0415(17) 13 ?
Al1 Mg1 3.0415(17) 13_565 ?
Al1 Mg1 3.0415(17) 1_545 ?
O1 Mg1 2.071(2) 13_665 ?
Cl1 Cl1 0.64(6) 3_655 ?
Cl1 Cl1 0.64(6) 14_666 ?
Cl1 O2W 1.18(6) 14_666 ?
Cl1 O2W 1.19(6) 3_655 ?
Cl1 Cl31 1.22(4) 3_655 ?
Cl1 Cl32 1.26(5) 3_655 ?
Cl1 Cl31 1.68(6) 14_666 ?
Cl1 O2W 1.69(5) . ?
Cl1 Cl32 1.81(8) . ?
Cl1 O2W 1.83(5) 8_665 ?
Cl1 Cl31 1.85(5) 19_655 ?
Cl1 Cl31 1.86(4) . ?
Cl2 Cl2 0.49(4) 3 ?
Cl2 Cl2 0.49(4) 14_556 ?
Cl2 Cl31 1.31(4) 3 ?
Cl2 Cl31 1.31(4) 19 ?
Cl2 Cl31 1.68(3) 21 ?
Cl2 Cl31 1.68(3) . ?
Cl2 Cl32 1.78(13) 3 ?
Cl2 O2W 1.78(3) 19 ?
Cl2 O2W 1.78(3) 3 ?
Cl2 Cl31 1.79(3) 8 ?
Cl2 Cl31 1.79(3) 14_556 ?
Cl2 O2W 1.89(3) . ?
Cl31 Cl32 0.67(8) . ?
Cl31 Cl31 0.81(5) 8 ?
Cl31 O2W 1.07(3) . ?
Cl31 Cl1 1.22(4) 14_666 ?
Cl31 Cl2 1.31(4) 14_556 ?
Cl31 Cl1 1.68(6) 3_655 ?
Cl31 O2W 1.73(4) 19 ?
Cl31 Cl2 1.79(3) 3 ?
Cl31 O2W 1.82(4) 3_655 ?
Cl31 Cl1 1.85(5) 19_545 ?
Cl32 Cl31 0.67(8) 8 ?
Cl32 Cl1 1.26(5) 14_666 ?
Cl32 Cl1 1.26(5) 19_545 ?
Cl32 O2W 1.35(12) 3_655 ?
Cl32 O2W 1.35(12) 21_655 ?
Cl32 O2W 1.64(6) 8 ?
Cl32 O2W 1.64(6) . ?
Cl32 Cl2 1.78(13) 14_556 ?
Cl32 Cl1 1.81(8) 8 ?
Cl32 Cl1 1.86(5) 3_655 ?
O2W O2W 0.82(6) 19 ?
O2W Cl1 1.18(6) 3_655 ?
O2W Cl1 1.19(6) 14_666 ?
O2W Cl32 1.35(13) 14_666 ?
O2W Cl31 1.73(4) 19 ?
O2W Cl2 1.78(3) 14_556 ?
O2W Cl31 1.82(4) 14_666 ?
O2W Cl1 1.83(5) 8_565 ?
O2W Cl31 1.87(4) 8 ?
 
loop_
 _geom_angle_atom_site_label_1
 _geom_angle_atom_site_label_2
 _geom_angle_atom_site_label_3
 _geom_angle
 _geom_angle_site_symmetry_1
 _geom_angle_site_symmetry_3
 _geom_angle_publ_flag
O1 Mg1 O1 173.95(11) 17 3_665 ?
O1 Mg1 O1 85.53(13) 17 5_565 ?
O1 Mg1 O1 99.27(11) 3_665 5_565 ?
O1 Mg1 O1 99.27(11) 17 15_565 ?
O1 Mg1 O1 85.53(13) 3_665 15_565 ?
O1 Mg1 O1 76.20(15) 5_565 15_565 ?
O1 Mg1 O1 99.27(11) 17 13_665 ?
O1 Mg1 O1 76.20(15) 3_665 13_665 ?
O1 Mg1 O1 173.95(11) 5_565 13_665 ?
O1 Mg1 O1 99.27(11) 15_565 13_665 ?
O1 Mg1 O1 76.20(15) 17 . ?
O1 Mg1 O1 99.27(11) 3_665 . ?
O1 Mg1 O1 99.27(11) 5_565 . ?
O1 Mg1 O1 173.95(11) 15_565 . ?
O1 Mg1 O1 85.53(13) 13_665 . ?
O1 Mg1 Mg1 86.97(6) 17 13_665 ?
O1 Mg1 Mg1 86.97(6) 3_665 13_665 ?
O1 Mg1 Mg1 141.90(7) 5_565 13_665 ?
O1 Mg1 Mg1 141.90(7) 15_565 13_665 ?
O1 Mg1 Mg1 42.76(6) 13_665 13_665 ?
O1 Mg1 Mg1 42.77(6) . 13_665 ?
O1 Mg1 Al1 93.03(6) 17 1_565 ?
O1 Mg1 Al1 93.03(6) 3_665 1_565 ?
O1 Mg1 Al1 38.10(7) 5_565 1_565 ?
O1 Mg1 Al1 38.10(7) 15_565 1_565 ?
O1 Mg1 Al1 137.24(6) 13_665 1_565 ?
O1 Mg1 Al1 137.23(6) . 1_565 ?
Mg1 Mg1 Al1 180.0 13_665 1_565 ?
O1 Mg1 Al1 38.10(7) 17 . ?
O1 Mg1 Al1 137.24(6) 3_665 . ?
O1 Mg1 Al1 93.03(6) 5_565 . ?
O1 Mg1 Al1 137.24(6) 15_565 . ?
O1 Mg1 Al1 93.03(6) 13_665 . ?
O1 Mg1 Al1 38.10(7) . . ?
Mg1 Mg1 Al1 60.0 13_665 . ?
Al1 Mg1 Al1 120.0 1_565 . ?
O1 Mg1 Al1 137.24(6) 17 1_665 ?
O1 Mg1 Al1 38.10(7) 3_665 1_665 ?
O1 Mg1 Al1 137.24(6) 5_565 1_665 ?
O1 Mg1 Al1 93.03(6) 15_565 1_665 ?
O1 Mg1 Al1 38.10(7) 13_665 1_665 ?
O1 Mg1 Al1 93.03(6) . 1_665 ?
Mg1 Mg1 Al1 60.0 13_665 1_665 ?
Al1 Mg1 Al1 120.0 1_565 1_665 ?
Al1 Mg1 Al1 120.0 . 1_665 ?
O1 Mg1 Mg1 141.90(7) 17 13_675 ?
O1 Mg1 Mg1 42.76(6) 3_665 13_675 ?
O1 Mg1 Mg1 86.97(6) 5_565 13_675 ?
O1 Mg1 Mg1 42.76(6) 15_565 13_675 ?
O1 Mg1 Mg1 86.97(6) 13_665 13_675 ?
O1 Mg1 Mg1 141.90(7) . 13_675 ?
Mg1 Mg1 Mg1 120.0 13_665 13_675 ?
Al1 Mg1 Mg1 60.0 1_565 13_675 ?
Al1 Mg1 Mg1 180.0 . 13_675 ?
Al1 Mg1 Mg1 60.0 1_665 13_675 ?
O1 Mg1 Mg1 42.76(6) 17 13_565 ?
O1 Mg1 Mg1 141.90(7) 3_665 13_565 ?
O1 Mg1 Mg1 42.76(6) 5_565 13_565 ?
O1 Mg1 Mg1 86.97(6) 15_565 13_565 ?
O1 Mg1 Mg1 141.90(7) 13_665 13_565 ?
O1 Mg1 Mg1 86.97(6) . 13_565 ?
Mg1 Mg1 Mg1 120.0 13_665 13_565 ?
Al1 Mg1 Mg1 60.0 1_565 13_565 ?
Al1 Mg1 Mg1 60.0 . 13_565 ?
Al1 Mg1 Mg1 180.0 1_665 13_565 ?
Mg1 Mg1 Mg1 120.0 13_675 13_565 ?
O1 Al1 O1 180.0 . 13 ?
O1 Al1 O1 84.33(14) . 17 ?
O1 Al1 O1 95.67(14) 13 17 ?
O1 Al1 O1 95.67(14) . 5 ?
O1 Al1 O1 84.33(14) 13 5 ?
O1 Al1 O1 180.00(18) 17 5 ?
O1 Al1 O1 84.33(14) . 15 ?
O1 Al1 O1 95.67(14) 13 15 ?
O1 Al1 O1 95.67(14) 17 15 ?
O1 Al1 O1 84.33(14) 5 15 ?
O1 Al1 O1 95.67(14) . 3 ?
O1 Al1 O1 84.33(14) 13 3 ?
O1 Al1 O1 84.33(14) 17 3 ?
O1 Al1 O1 95.67(14) 5 3 ?
O1 Al1 O1 180.00(18) 15 3 ?
O1 Al1 Mg1 137.84(7) . 1_445 ?
O1 Al1 Mg1 42.16(7) 13 1_445 ?
O1 Al1 Mg1 90.0 17 1_445 ?
O1 Al1 Mg1 90.0 5 1_445 ?
O1 Al1 Mg1 137.84(7) 15 1_445 ?
O1 Al1 Mg1 42.16(7) 3 1_445 ?
O1 Al1 Mg1 42.16(7) . 13_665 ?
O1 Al1 Mg1 137.84(7) 13 13_665 ?
O1 Al1 Mg1 90.0 17 13_665 ?
O1 Al1 Mg1 90.0 5 13_665 ?
O1 Al1 Mg1 42.16(7) 15 13_665 ?
O1 Al1 Mg1 137.84(7) 3 13_665 ?
Mg1 Al1 Mg1 180.0 1_445 13_665 ?
O1 Al1 Mg1 137.84(7) . 13 ?
O1 Al1 Mg1 42.16(7) 13 13 ?
O1 Al1 Mg1 137.84(7) 17 13 ?
O1 Al1 Mg1 42.16(7) 5 13 ?
O1 Al1 Mg1 90.0 15 13 ?
O1 Al1 Mg1 90.0 3 13 ?
Mg1 Al1 Mg1 60.0 1_445 13 ?
Mg1 Al1 Mg1 120.0 13_665 13 ?
O1 Al1 Mg1 42.16(7) . . ?
O1 Al1 Mg1 137.84(7) 13 . ?
O1 Al1 Mg1 42.16(7) 17 . ?
O1 Al1 Mg1 137.84(7) 5 . ?
O1 Al1 Mg1 90.0 15 . ?
O1 Al1 Mg1 90.0 3 . ?
Mg1 Al1 Mg1 120.0 1_445 . ?
Mg1 Al1 Mg1 60.0 13_665 . ?
Mg1 Al1 Mg1 180.0 13 . ?
O1 Al1 Mg1 90.0 . 13_565 ?
O1 Al1 Mg1 90.0 13 13_565 ?
O1 Al1 Mg1 42.16(7) 17 13_565 ?
O1 Al1 Mg1 137.84(7) 5 13_565 ?
O1 Al1 Mg1 137.84(7) 15 13_565 ?
O1 Al1 Mg1 42.16(7) 3 13_565 ?
Mg1 Al1 Mg1 60.0 1_445 13_565 ?
Mg1 Al1 Mg1 120.0 13_665 13_565 ?
Mg1 Al1 Mg1 120.0 13 13_565 ?
Mg1 Al1 Mg1 60.0 . 13_565 ?
O1 Al1 Mg1 90.0 . 1_545 ?
O1 Al1 Mg1 90.0 13 1_545 ?
O1 Al1 Mg1 137.84(7) 17 1_545 ?
O1 Al1 Mg1 42.16(7) 5 1_545 ?
O1 Al1 Mg1 42.16(7) 15 1_545 ?
O1 Al1 Mg1 137.84(7) 3 1_545 ?
Mg1 Al1 Mg1 120.0 1_445 1_545 ?
Mg1 Al1 Mg1 60.0 13_665 1_545 ?
Mg1 Al1 Mg1 60.0 13 1_545 ?
Mg1 Al1 Mg1 120.0 . 1_545 ?
Mg1 Al1 Mg1 180.0 13_565 1_545 ?
Al1 O1 Mg1 99.74(12) . 13_665 ?
Al1 O1 Mg1 99.74(12) . . ?
Mg1 O1 Mg1 94.47(13) 13_665 . ?
Cl1 Cl1 Cl1 60.00(3) 3_655 14_666 ?
Cl1 Cl1 O2W 75(9) 3_655 14_666 ?
Cl1 Cl1 O2W 135(9) 14_666 14_666 ?
Cl1 Cl1 O2W 133(9) 3_655 3_655 ?
Cl1 Cl1 O2W 73(9) 14_666 3_655 ?
O2W Cl1 O2W 151(3) 14_666 3_655 ?
Cl1 Cl1 Cl31 174(10) 3_655 3_655 ?
Cl1 Cl1 Cl31 126(10) 14_666 3_655 ?
O2W Cl1 Cl31 99(3) 14_666 3_655 ?
O2W Cl1 Cl31 53(3) 3_655 3_655 ?
Cl1 Cl1 Cl32 143(10) 3_655 3_655 ?
Cl1 Cl1 Cl32 157(10) 14_666 3_655 ?
O2W Cl1 Cl32 67(6) 14_666 3_655 ?
O2W Cl1 Cl32 84(6) 3_655 3_655 ?
Cl31 Cl1 Cl32 31(4) 3_655 3_655 ?
Cl1 Cl1 Cl31 36(8) 3_655 14_666 ?
Cl1 Cl1 Cl31 96(8) 14_666 14_666 ?
O2W Cl1 Cl31 39(2) 14_666 14_666 ?
O2W Cl1 Cl31 169(3) 3_655 14_666 ?
Cl31 Cl1 Cl31 138(3) 3_655 14_666 ?
Cl32 Cl1 Cl31 107(6) 3_655 14_666 ?
Cl1 Cl1 O2W 29(7) 3_655 . ?
Cl1 Cl1 O2W 31(7) 14_666 . ?
O2W Cl1 O2W 105(3) 14_666 . ?
O2W Cl1 O2W 104(3) 3_655 . ?
Cl31 Cl1 O2W 157(5) 3_655 . ?
Cl32 Cl1 O2W 172(7) 3_655 . ?
Cl31 Cl1 O2W 65(2) 14_666 . ?
Cl1 Cl1 Cl32 85(8) 3_655 . ?
Cl1 Cl1 Cl32 25(8) 14_666 . ?
O2W Cl1 Cl32 160(5) 14_666 . ?
O2W Cl1 Cl32 48(4) 3_655 . ?
Cl31 Cl1 Cl32 101(4) 3_655 . ?
Cl32 Cl1 Cl32 132(4) 3_655 . ?
Cl31 Cl1 Cl32 121(3) 14_666 . ?
O2W Cl1 Cl32 56(4) . . ?
Cl1 Cl1 O2W 95(10) 3_655 8_665 ?
Cl1 Cl1 O2W 155(9) 14_666 8_665 ?
O2W Cl1 O2W 19.5(17) 14_666 8_665 ?
O2W Cl1 O2W 132(3) 3_655 8_665 ?
Cl31 Cl1 O2W 79(3) 3_655 8_665 ?
Cl32 Cl1 O2W 48(6) 3_655 8_665 ?
Cl31 Cl1 O2W 59(2) 14_666 8_665 ?
O2W Cl1 O2W 124(3) . 8_665 ?
Cl32 Cl1 O2W 180(5) . 8_665 ?
Cl1 Cl1 Cl31 154(10) 3_655 19_655 ?
Cl1 Cl1 Cl31 146(10) 14_666 19_655 ?
O2W Cl1 Cl31 79(3) 14_666 19_655 ?
O2W Cl1 Cl31 72(2) 3_655 19_655 ?
Cl31 Cl1 Cl31 19.7(14) 3_655 19_655 ?
Cl32 Cl1 Cl31 12(5) 3_655 19_655 ?
Cl31 Cl1 Cl31 118(3) 14_666 19_655 ?
O2W Cl1 Cl31 176(4) . 19_655 ?
Cl32 Cl1 Cl31 121(4) . 19_655 ?
O2W Cl1 Cl31 59.4(17) 8_665 19_655 ?
Cl1 Cl1 Cl31 64(7) 3_655 . ?
Cl1 Cl1 Cl31 4(7) 14_666 . ?
O2W Cl1 Cl31 139(3) 14_666 . ?
O2W Cl1 Cl31 69(3) 3_655 . ?
Cl31 Cl1 Cl31 122(4) 3_655 . ?
Cl32 Cl1 Cl31 153(6) 3_655 . ?
Cl31 Cl1 Cl31 100.0(17) 14_666 . ?
O2W Cl1 Cl31 34.7(14) . . ?
Cl32 Cl1 Cl31 21(3) . . ?
O2W Cl1 Cl31 159(3) 8_665 . ?
Cl31 Cl1 Cl31 142(3) 19_655 . ?
Cl2 Cl2 Cl2 60.0 3 14_556 ?
Cl2 Cl2 Cl31 132.0(14) 3 3 ?
Cl2 Cl2 Cl31 168.0(14) 14_556 3 ?
Cl2 Cl2 Cl31 168.0(13) 3 19 ?
Cl2 Cl2 Cl31 132.0(14) 14_556 19 ?
Cl31 Cl2 Cl31 36(3) 3 19 ?
Cl2 Cl2 Cl31 35.5(11) 3 21 ?
Cl2 Cl2 Cl31 95.5(11) 14_556 21 ?
Cl31 Cl2 Cl31 97(2) 3 21 ?
Cl31 Cl2 Cl31 132.5(12) 19 21 ?
Cl2 Cl2 Cl31 95.5(11) 3 . ?
Cl2 Cl2 Cl31 35.5(11) 14_556 . ?
Cl31 Cl2 Cl31 132.5(12) 3 . ?
Cl31 Cl2 Cl31 97(2) 19 . ?
Cl31 Cl2 Cl31 131(2) 21 . ?
Cl2 Cl2 Cl32 150.00(6) 3 3 ?
Cl2 Cl2 Cl32 150.00(10) 14_556 3 ?
Cl31 Cl2 Cl32 18.0(14) 3 3 ?
Cl31 Cl2 Cl32 18.0(13) 19 3 ?
Cl31 Cl2 Cl32 114.5(11) 21 3 ?
Cl31 Cl2 Cl32 114.5(11) . 3 ?
Cl2 Cl2 O2W 155.2(12) 3 19 ?
Cl2 Cl2 O2W 95.2(12) 14_556 19 ?
Cl31 Cl2 O2W 73(2) 3 19 ?
Cl31 Cl2 O2W 36.8(16) 19 19 ?
Cl31 Cl2 O2W 169.3(19) 21 19 ?
Cl31 Cl2 O2W 59.8(14) . 19 ?
Cl32 Cl2 O2W 54.8(12) 3 19 ?
Cl2 Cl2 O2W 95.2(12) 3 3 ?
Cl2 Cl2 O2W 155.2(12) 14_556 3 ?
Cl31 Cl2 O2W 36.8(16) 3 3 ?
Cl31 Cl2 O2W 73(2) 19 3 ?
Cl31 Cl2 O2W 59.7(14) 21 3 ?
Cl31 Cl2 O2W 169.3(19) . 3 ?
Cl32 Cl2 O2W 54.8(12) 3 3 ?
O2W Cl2 O2W 110(2) 19 3 ?
Cl2 Cl2 Cl31 68.7(11) 3 8 ?
Cl2 Cl2 Cl31 8.7(11) 14_556 8 ?
Cl31 Cl2 Cl31 159(2) 3 8 ?
Cl31 Cl2 Cl31 123.3(3) 19 8 ?
Cl31 Cl2 Cl31 104.2(13) 21 8 ?
Cl31 Cl2 Cl31 26.7(18) . 8 ?
Cl32 Cl2 Cl31 141.3(11) 3 8 ?
O2W Cl2 Cl31 86.5(13) 19 8 ?
O2W Cl2 Cl31 164.0(19) 3 8 ?
Cl2 Cl2 Cl31 8.7(11) 3 14_556 ?
Cl2 Cl2 Cl31 68.7(11) 14_556 14_556 ?
Cl31 Cl2 Cl31 123.3(4) 3 14_556 ?
Cl31 Cl2 Cl31 159(2) 19 14_556 ?
Cl31 Cl2 Cl31 26.7(18) 21 14_556 ?
Cl31 Cl2 Cl31 104.2(13) . 14_556 ?
Cl32 Cl2 Cl31 141.3(11) 3 14_556 ?
O2W Cl2 Cl31 164.0(19) 19 14_556 ?
O2W Cl2 Cl31 86.5(13) 3 14_556 ?
Cl31 Cl2 Cl31 77(2) 8 14_556 ?
Cl2 Cl2 O2W 129.8(11) 3 . ?
Cl2 Cl2 O2W 69.8(12) 14_556 . ?
Cl31 Cl2 O2W 98.2(18) 3 . ?
Cl31 Cl2 O2W 62.2(17) 19 . ?
Cl31 Cl2 O2W 165(2) 21 . ?
Cl31 Cl2 O2W 34.3(11) . . ?
Cl32 Cl2 O2W 80.2(11) 3 . ?
O2W Cl2 O2W 25.4(19) 19 . ?
O2W Cl2 O2W 135.0(14) 3 . ?
Cl31 Cl2 O2W 61.1(14) 8 . ?
Cl31 Cl2 O2W 138.5(18) 14_556 . ?
Cl32 Cl31 Cl31 53(6) . 8 ?
Cl32 Cl31 O2W 139(6) . . ?
Cl31 Cl31 O2W 168(2) 8 . ?
Cl32 Cl31 Cl1 77(6) . 14_666 ?
Cl31 Cl31 Cl1 130(3) 8 14_666 ?
O2W Cl31 Cl1 62(3) . 14_666 ?
Cl32 Cl31 Cl2 125(7) . 14_556 ?
Cl31 Cl31 Cl2 72.0(13) 8 14_556 ?
O2W Cl31 Cl2 96(3) . 14_556 ?
Cl1 Cl31 Cl2 158(4) 14_666 14_556 ?
Cl32 Cl31 Cl2 137(7) . . ?
Cl31 Cl31 Cl2 84.5(11) 8 . ?
O2W Cl31 Cl2 84(3) . . ?
Cl1 Cl31 Cl2 146(3) 14_666 . ?
Cl2 Cl31 Cl2 12.5(12) 14_556 . ?
Cl32 Cl31 Cl1 95(6) . 3_655 ?
Cl31 Cl31 Cl1 147.7(19) 8 3_655 ?
O2W Cl31 Cl1 44(2) . 3_655 ?
Cl1 Cl31 Cl1 18(3) 14_666 3_655 ?
Cl2 Cl31 Cl1 140(3) 14_556 3_655 ?
Cl2 Cl31 Cl1 128(3) . 3_655 ?
Cl32 Cl31 O2W 160(6) . 19 ?
Cl31 Cl31 O2W 147.6(10) 8 19 ?
O2W Cl31 O2W 21(2) . 19 ?
Cl1 Cl31 O2W 83(3) 14_666 19 ?
Cl2 Cl31 O2W 76(2) 14_556 19 ?
Cl2 Cl31 O2W 63.1(17) . 19 ?
Cl1 Cl31 O2W 64.7(17) 3_655 19 ?
Cl32 Cl31 Cl2 121(7) . 3 ?
Cl31 Cl31 Cl2 68.7(11) 8 3 ?
O2W Cl31 Cl2 99(3) . 3 ?
Cl1 Cl31 Cl2 161(3) 14_666 3 ?
Cl2 Cl31 Cl2 3.3(3) 14_556 3 ?
Cl2 Cl31 Cl2 15.8(13) . 3 ?
Cl1 Cl31 Cl2 144(3) 3_655 3 ?
O2W Cl31 Cl2 78.8(18) 19 3 ?
Cl32 Cl31 O2W 37(6) . 3_655 ?
Cl31 Cl31 O2W 90.1(13) 8 3_655 ?
O2W Cl31 O2W 102(3) . 3_655 ?
Cl1 Cl31 O2W 40(3) 14_666 3_655 ?
Cl2 Cl31 O2W 162(2) 14_556 3_655 ?
Cl2 Cl31 O2W 175(2) . 3_655 ?
Cl1 Cl31 O2W 57.6(19) 3_655 3_655 ?
O2W Cl31 O2W 122.4(12) 19 3_655 ?
Cl2 Cl31 O2W 159(2) 3 3_655 ?
Cl32 Cl31 Cl1 22(7) . 19_545 ?
Cl31 Cl31 Cl1 30.5(18) 8 19_545 ?
O2W Cl31 Cl1 161(3) . 19_545 ?
Cl1 Cl31 Cl1 99(4) 14_666 19_545 ?
Cl2 Cl31 Cl1 102(2) 14_556 19_545 ?
Cl2 Cl31 Cl1 115(2) . 19_545 ?
Cl1 Cl31 Cl1 117(2) 3_655 19_545 ?
O2W Cl31 Cl1 178(2) 19 19_545 ?
Cl2 Cl31 Cl1 99(2) 3 19_545 ?
O2W Cl31 Cl1 60(2) 3_655 19_545 ?
Cl32 Cl31 Cl1 75(6) . . ?
Cl31 Cl31 Cl1 127.7(19) 8 . ?
O2W Cl31 Cl1 64(2) . . ?
Cl1 Cl31 Cl1 2(4) 14_666 . ?
Cl2 Cl31 Cl1 160(3) 14_556 . ?
Cl2 Cl31 Cl1 148(2) . . ?
Cl1 Cl31 Cl1 20.0(17) 3_655 . ?
O2W Cl31 Cl1 84.7(17) 19 . ?
Cl2 Cl31 Cl1 164(3) 3 . ?
O2W Cl31 Cl1 37.7(19) 3_655 . ?
Cl1 Cl31 Cl1 97.2(17) 19_545 . ?
Cl31 Cl32 Cl31 75(10) . 8 ?
Cl31 Cl32 Cl1 72(3) . 14_666 ?
Cl31 Cl32 Cl1 146(10) 8 14_666 ?
Cl31 Cl32 Cl1 146(10) . 19_545 ?
Cl31 Cl32 Cl1 72(3) 8 19_545 ?
Cl1 Cl32 Cl1 142(10) 14_666 19_545 ?
Cl31 Cl32 O2W 125(5) . 3_655 ?
Cl31 Cl32 O2W 160(8) 8 3_655 ?
Cl1 Cl32 O2W 54(5) 14_666 3_655 ?
Cl1 Cl32 O2W 89(7) 19_545 3_655 ?
Cl31 Cl32 O2W 160(8) . 21_655 ?
Cl31 Cl32 O2W 125(5) 8 21_655 ?
Cl1 Cl32 O2W 89(7) 14_666 21_655 ?
Cl1 Cl32 O2W 54(5) 19_545 21_655 ?
O2W Cl32 O2W 35(4) 3_655 21_655 ?
Cl31 Cl32 O2W 100(10) . 8 ?
Cl31 Cl32 O2W 25(3) 8 8 ?
Cl1 Cl32 O2W 172(10) 14_666 8 ?
Cl1 Cl32 O2W 46(3) 19_545 8 ?
O2W Cl32 O2W 135(6) 3_655 8 ?
O2W Cl32 O2W 100(3) 21_655 8 ?
Cl31 Cl32 O2W 25(3) . . ?
Cl31 Cl32 O2W 100(10) 8 . ?
Cl1 Cl32 O2W 46(3) 14_666 . ?
Cl1 Cl32 O2W 172(10) 19_545 . ?
O2W Cl32 O2W 100(3) 3_655 . ?
O2W Cl32 O2W 135(6) 21_655 . ?
O2W Cl32 O2W 125(8) 8 . ?
Cl31 Cl32 Cl2 37(6) . 14_556 ?
Cl31 Cl32 Cl2 37(6) 8 14_556 ?
Cl1 Cl32 Cl2 109(6) 14_666 14_556 ?
Cl1 Cl32 Cl2 109(6) 19_545 14_556 ?
O2W Cl32 Cl2 162(2) 3_655 14_556 ?
O2W Cl32 Cl2 162(2) 21_655 14_556 ?
O2W Cl32 Cl2 63(4) 8 14_556 ?
O2W Cl32 Cl2 63(4) . 14_556 ?
Cl31 Cl32 Cl1 159(10) . 8 ?
Cl31 Cl32 Cl1 84(3) 8 8 ?
Cl1 Cl32 Cl1 130(9) 14_666 8 ?
Cl1 Cl32 Cl1 12(4) 19_545 8 ?
O2W Cl32 Cl1 76(6) 3_655 8 ?
O2W Cl32 Cl1 41(3) 21_655 8 ?
O2W Cl32 Cl1 58.7(17) 8 8 ?
O2W Cl32 Cl1 176(8) . 8 ?
Cl2 Cl32 Cl1 121(4) 14_556 8 ?
Cl31 Cl32 Cl1 84(3) . . ?
Cl31 Cl32 Cl1 159(10) 8 . ?
Cl1 Cl32 Cl1 12(4) 14_666 . ?
Cl1 Cl32 Cl1 130(9) 19_545 . ?
O2W Cl32 Cl1 41(3) 3_655 . ?
O2W Cl32 Cl1 76(6) 21_655 . ?
O2W Cl32 Cl1 176(8) 8 . ?
O2W Cl32 Cl1 58.7(17) . . ?
Cl2 Cl32 Cl1 121(4) 14_556 . ?
Cl1 Cl32 Cl1 117(8) 8 . ?
Cl31 Cl32 Cl1 64(3) . 3_655 ?
Cl31 Cl32 Cl1 139(10) 8 3_655 ?
Cl1 Cl32 Cl1 8(4) 14_666 3_655 ?
Cl1 Cl32 Cl1 150(9) 19_545 3_655 ?
O2W Cl32 Cl1 61(3) 3_655 3_655 ?
O2W Cl32 Cl1 96(6) 21_655 3_655 ?
O2W Cl32 Cl1 164(8) 8 3_655 ?
O2W Cl32 Cl1 38.7(16) . 3_655 ?
Cl2 Cl32 Cl1 101(4) 14_556 3_655 ?
Cl1 Cl32 Cl1 137(8) 8 3_655 ?
Cl1 Cl32 Cl1 20.0(16) . 3_655 ?
O2W O2W Cl31 132(2) 19 . ?
O2W O2W Cl1 132(2) 19 3_655 ?
Cl31 O2W Cl1 97(3) . 3_655 ?
O2W O2W Cl1 163(2) 19 14_666 ?
Cl31 O2W Cl1 65(3) . 14_666 ?
Cl1 O2W Cl1 31(3) 3_655 14_666 ?
O2W O2W Cl32 72(2) 19 14_666 ?
Cl31 O2W Cl32 156(3) . 14_666 ?
Cl1 O2W Cl32 59(3) 3_655 14_666 ?
Cl1 O2W Cl32 90(3) 14_666 14_666 ?
O2W O2W Cl32 147(4) 19 . ?
Cl31 O2W Cl32 16(3) . . ?
Cl1 O2W Cl32 81(5) 3_655 . ?
Cl1 O2W Cl32 50(4) 14_666 . ?
Cl32 O2W Cl32 140(3) 14_666 . ?
O2W O2W Cl1 147(2) 19 . ?
Cl31 O2W Cl1 81(3) . . ?
Cl1 O2W Cl1 15(3) 3_655 . ?
Cl1 O2W Cl1 16(3) 14_666 . ?
Cl32 O2W Cl1 75(3) 14_666 . ?
Cl32 O2W Cl1 66(4) . . ?
O2W O2W Cl31 27.6(10) 19 19 ?
Cl31 O2W Cl31 104(3) . 19 ?
Cl1 O2W Cl31 159(3) 3_655 19 ?
Cl1 O2W Cl31 170(3) 14_666 19 ?
Cl32 O2W Cl31 100(3) 14_666 19 ?
Cl32 O2W Cl31 120(5) . 19 ?
Cl1 O2W Cl31 175(3) . 19 ?
O2W O2W Cl2 84.8(12) 19 14_556 ?
Cl31 O2W Cl2 47(2) . 14_556 ?
Cl1 O2W Cl2 144(3) 3_655 14_556 ?
Cl1 O2W Cl2 112(3) 14_666 14_556 ?
Cl32 O2W Cl2 157(3) 14_666 14_556 ?
Cl32 O2W Cl2 63(4) . 14_556 ?
Cl1 O2W Cl2 128(3) . 14_556 ?
Cl31 O2W Cl2 57.2(13) 19 14_556 ?
O2W O2W Cl31 89.9(13) 19 14_666 ?
Cl31 O2W Cl31 138(3) . 14_666 ?
Cl1 O2W Cl31 41.6(18) 3_655 14_666 ?
Cl1 O2W Cl31 73(2) 14_666 14_666 ?
Cl32 O2W Cl31 17.5(15) 14_666 14_666 ?
Cl32 O2W Cl31 123(4) . 14_666 ?
Cl1 O2W Cl31 57(2) . 14_666 ?
Cl31 O2W Cl31 117.5(19) 19 14_666 ?
Cl2 O2W Cl31 175(2) 14_556 14_666 ?
O2W O2W Cl1 28.9(16) 19 8_565 ?
Cl31 O2W Cl1 161(3) . 8_565 ?
Cl1 O2W Cl1 103(3) 3_655 8_565 ?
Cl1 O2W Cl1 134(2) 14_666 8_565 ?
Cl32 O2W Cl1 44(2) 14_666 8_565 ?
Cl32 O2W Cl1 176(5) . 8_565 ?
Cl1 O2W Cl1 118(2) . 8_565 ?
Cl31 O2W Cl1 56.5(18) 19 8_565 ?
Cl2 O2W Cl1 114(2) 14_556 8_565 ?
Cl31 O2W Cl1 61.0(17) 14_666 8_565 ?
O2W O2W Cl31 126.7(14) 19 8 ?
Cl31 O2W Cl31 5.1(9) . 8 ?
Cl1 O2W Cl31 102(3) 3_655 8 ?
Cl1 O2W Cl31 70(2) 14_666 8 ?
Cl32 O2W Cl31 161(3) 14_666 8 ?
Cl32 O2W Cl31 21(3) . 8 ?
Cl1 O2W Cl31 86(3) . 8 ?
Cl31 O2W Cl31 99(2) 19 8 ?
Cl2 O2W Cl31 42.0(14) 14_556 8 ?
Cl31 O2W Cl31 143(2) 14_666 8 ?
Cl1 O2W Cl31 156(2) 8_565 8 ?
 
_refine_diff_density_max    0.534
_refine_diff_density_min   -0.675
_refine_diff_density_rms    0.152

_shelxl_version_number 2014/6

_shelx_res_file
;
TITL mo_82771_2_0m in P-3c1      New: P63/mcm
CELL  0.71073    5.2680    5.2680   15.2970    90.000    90.000   120.000
ZERR        2    0.0030    0.0030    0.0080     0.000     0.000     0.000
LATT   1
SYMM           X - Y ,              X ,    0.50000 + Z
SYMM             - Y ,          X - Y ,              Z
SYMM             - X ,            - Y ,    0.50000 + Z
SYMM         - X + Y ,            - X ,              Z
SYMM               Y ,        - X + Y ,    0.50000 + Z
SYMM             - Y ,            - X ,            - Z
SYMM           X - Y ,            - Y ,    0.50000 - Z
SYMM               X ,          X - Y ,            - Z
SYMM               Y ,              X ,    0.50000 - Z
SYMM         - X + Y ,              Y ,            - Z
SYMM             - X ,        - X + Y ,    0.50000 - Z
SFAC     Al    Mg   O    H     Cl
UNIT     2     4   14   12    2

L.S. 15
ACTA
htab

WGHT    0.117800
FVAR       0.34703   0.04359   0.07979   0.07737   0.04911   0.17671   0.13101
MG1   2    0.333333    0.666667    0.000000    10.16666    0.00924    0.00924 =
         0.03172    0.00000    0.00000    0.00462
AL1   1    0.000000    0.000000    0.000000    10.08333    0.00859    0.00859 =
         0.03109    0.00000    0.00000    0.00429
O1    3    0.309353    0.309353    0.064371    10.50000    0.00914    0.00914 =
         0.02689   -0.00089   -0.00089    0.00371
H1    4    0.294284    0.294284    0.124060    10.50000   10.02000
rem int
CL1   5    0.739205    0.338471    0.250000    20.50000    0.03945
CL2   5    0.000000    0.053716    0.250000    30.25000    0.03007
CL31  5    0.334899    0.088886    0.250000    40.50000    0.03941
CL32  5    0.391578    0.000000    0.250000    50.25000    0.05928
O2W   3    0.408215    0.318892    0.250000    60.50000    0.07011

HKLF 4

REM  mo_82771_2_0m in P-3c1      New: P63/mcm
REM R1 =  0.0824 for     152 Fo > 4sig(Fo)  and  0.1205 for all     277 data
REM     32 parameters refined using      0 restraints

END

WGHT      0.1186      0.0000

REM Instructions for potential hydrogen bonds
HTAB O1 Cl1
EQIV $1 -x+y+1, -x+1, -z+1/2
HTAB O1 Cl1_$1
EQIV $2 -y+1, x-y, z
HTAB O1 Cl1_$2
EQIV $3 y, x, z
HTAB O1 Cl1_$3
EQIV $4 x-y, -y+1, -z+1/2
HTAB O1 Cl1_$4
EQIV $5 -x+1, -x+y+1, z
HTAB O1 Cl1_$5
HTAB O1 Cl2
EQIV $6 -x+y, -x, -z+1/2
HTAB O1 Cl2_$6
EQIV $7 -y, x-y, z
HTAB O1 Cl2_$7
HTAB O1 Cl31
HTAB O1 Cl31_$1
HTAB O1 Cl31_$7
HTAB O1 Cl31_$3
EQIV $8 x-y, -y, -z+1/2
HTAB O1 Cl31_$8
HTAB O1 Cl31_$5
HTAB O1 Cl32
HTAB O1 Cl32_$1
HTAB O1 Cl32_$7
HTAB O1 O2W
HTAB O1 O2W_$3

REM Highest difference peak  0.534,  deepest hole -0.675,  1-sigma level  0.152
Q1    1   0.3333  0.6667 -0.0719  10.33333  0.05    0.53
Q2    1   0.2313  0.1573  0.2500  10.50000  0.05    0.49
Q3    1   0.2911  0.2911  0.2500  10.25000  0.05    0.48
Q4    1   0.3094  0.3094  0.1831  10.50000  0.05    0.45
Q5    1   0.3132  0.3132  0.0008  10.50000  0.05    0.40
Q6    1   0.1777  0.1777  0.0564  10.50000  0.05    0.39
Q7    1   0.0000  0.0000  0.0742  10.16667  0.05    0.39
Q8    1   0.3166  0.0852  0.0669  11.00000  0.05    0.37
Q9    1   0.5608  0.5608  0.0655  10.50000  0.05    0.36
Q10   1   0.0000  0.0000  0.1812  10.16667  0.05    0.32
Q11   1   0.5032  0.3194  0.0563  11.00000  0.05    0.30
Q12   1   0.7917  0.2574  0.2500  10.50000  0.05    0.28
Q13   1   0.8475  0.4239  0.1908  11.00000  0.05    0.28
Q14   1   0.3868 -0.0686  0.3071  11.00000  0.05    0.28
Q15   1   0.2856  0.0000  0.1340  10.50000  0.05    0.27
Q16   1   0.6667  0.3333  0.1858  10.33333  0.05    0.25
Q17   1   0.3117  0.1220  0.3235  11.00000  0.05    0.24
Q18   1   0.5924  0.5924  0.1252  10.50000  0.05    0.24
Q19   1   0.0000  0.1785  0.1973  10.50000  0.05    0.22
Q20   1   0.1330  0.1330  0.1914  10.50000  0.05    0.20
;
_shelx_res_checksum   39520

_shelx_hkl_file
;
   0  -1   0   17.32    1.07
  -1   1   0   14.05    1.67
  -1   1   0   19.27    1.47
   1   0   0   18.15    1.08
   1  -1   0   17.10    1.19
   1  -1   0   13.56    1.08
  -1   0   0   19.50    1.31
   1  -1   0   13.14    1.76
  -1   0   0   20.02    1.18
  -1   0   0   19.03    2.02
  -2   1   0   32.29    2.23
  -2   1   0   29.57    2.88
   1  -2   0   22.58    2.21
   1  -2   0   26.52    1.54
   2  -1   0   33.29    1.76
  -1  -1   0   37.62    2.34
  -1  -1   0   33.79    1.49
  -2   2   0   13.17    1.47
  -2   2   0   10.55    1.81
   2   0   0   11.27    1.25
   0  -2   0   13.00    0.95
  -2   0   0   11.48    1.43
   2  -2   0   10.94    1.49
  -2   0   0   13.51    2.21
   2  -2   0   10.39    1.96
   2  -2   0   11.01    1.28
  -3   1   0   -0.71    1.15
  -3   1   0    0.14    1.83
   2  -3   0   -0.73    1.53
   2  -3   0    0.23    0.87
   3  -1   0    0.64    0.88
  -1  -2   0   -0.39    0.96
  -1  -2   0    0.31    0.52
   1  -3   0   -0.97    0.58
  -3   2   0    0.66    1.27
   1  -3   0    0.27    1.10
  -3   2   0   -0.37    1.83
  -2  -1   0    1.70    0.86
   3  -2   0   -0.11    0.89
  -2  -1   0    1.09    1.47
  -3   3   0  941.70   22.59
  -3   0   0  956.25   28.26
   3  -3   0  909.04   21.47
  -3   0   0 1000.00   26.53
   3  -3   0  935.96   26.70
   3  -4   0   13.28    1.93
  -4   1   0   13.31    3.27
  -4   1   0   10.99    1.92
  -4   2   0   62.20    5.12
  -4   2   0   59.88    3.45
   2  -4   0   52.20    2.80
   2  -4   0   43.41    3.83
  -2  -2   0   55.47    2.57
  -2  -2   0   61.50    4.19
   4  -2   0   61.55    3.21
  -4   3   0   11.31    2.25
  -3  -1   0   13.27    1.64
  -3  -1   0   17.37    3.15
   4  -3   0   17.33    2.21
  -4   4   0   17.94    2.96
  -4   0   0   26.29    4.35
   4  -4   0   24.19    2.83
  -5   1   0   40.98    5.51
   4  -5   0   44.35    3.39
  -5   2   0    2.21    3.05
   3  -5   0    4.83    1.61
  -2  -3   0    3.96    1.07
  -2  -3   0    4.76    1.90
   2  -5   0    3.41    1.22
   2  -5   0    1.85    1.97
  -3  -2   0    5.92    2.58
   5  -3   0    4.41    1.86
  -4  -1   0   42.55    5.23
   5  -4   0   51.65    3.82
  -5   0   0    4.30    3.71
   5  -5   0    3.25    2.03
   5  -6   0    1.43    2.08
   4  -6   0    1.08    1.71
  -2  -4   0   -0.27    1.01
  -2  -4   0   -0.29    1.64
   3  -6   0  169.91    6.49
  -3  -3   0  165.47    7.54
   2  -6   0   -0.75    1.10
  -4  -2   0    0.22    2.73
  -5  -1   0    5.39    3.77
   4  -7   0   11.61    2.61
  -7   3   0    3.53    2.28
   3  -7   0   11.22    2.19
  -4  -3   0   10.11    3.31
  -8   4   0    6.20    2.75
  -1   0  -1    0.00    0.55
   1  -1  -1    0.17    1.31
   1  -1  -1    0.48    0.61
   1  -1  -1    0.90    0.77
  -1   0  -1    0.17    1.17
  -1   0  -1    0.59    0.71
  -1   1   1    0.23    1.14
   1   0   1    0.08    0.51
   0  -1   1    0.37    0.54
  -1   1   1   -0.51    0.83
   0  -1  -1    0.46    0.53
  -1   1  -1    0.76    1.24
   1   0  -1   -1.05    0.64
  -1   1  -1    2.16    0.93
   1  -1   1    0.62    0.64
   1  -1   1    0.88    1.33
  -1   0   1   -0.78    0.65
  -1   0   1   -0.19    1.11
   1  -1   1    2.85    0.88
  -1  -1  -1   69.11    2.98
  -1  -1  -1   68.77    2.36
   2  -1  -1   67.73    2.69
  -1  -1  -1   67.47    2.10
  -2   1   1   67.81    3.72
   1  -2   1   67.78    2.47
   1  -2   1   59.96    3.19
  -2   1   1   70.06    2.86
  -2  -1  -1    1.06    1.51
  -2  -1  -1    1.10    0.79
   3  -2  -1    2.74    1.10
  -2  -1  -1    1.14    0.70
  -3   2   1    1.38    1.84
   1  -3   1    1.50    1.23
  -3   2   1    3.68    1.41
   1  -3   1    1.53    0.69
   2  -2  -1    0.32    0.87
   2  -2  -1   -0.24    1.61
  -2   0  -1    1.02    1.69
   2  -2  -1   -0.80    1.43
  -2   0  -1    0.13    0.74
  -2   2   1    0.44    1.40
  -2   2   1   -0.39    1.16
   2   0   1    0.42    0.68
   0  -2   1    0.29    0.61
   1  -2  -1   66.87    3.18
  -2   1  -1   72.37    3.09
   1  -2  -1   68.87    2.51
  -2   1  -1   66.46    3.99
  -1  -1   1   74.18    2.51
  -1  -1   1   73.86    3.17
   2  -1   1   72.17    2.81
  -2   2  -1    0.40    1.51
   2   0  -1    0.89    0.81
   0  -2  -1    1.38    0.61
  -2   2  -1   -1.79    1.11
  -2   0   1   -1.61    1.56
   2  -2   1   -0.33    1.58
  -2   0   1    0.13    0.84
   2  -2   1    1.72    1.53
   2  -2   1    0.13    0.87
  -1  -2  -1    1.99    1.01
   3  -1  -1    0.73    0.85
  -1  -2  -1    1.48    0.80
  -3   1   1    2.62    2.01
   2  -3   1    3.77    1.79
  -3   1   1   -0.22    1.22
   2  -3   1    0.82    0.89
  -2  -2  -1   11.60    1.48
  -2  -2  -1   11.92    2.51
   4  -2  -1   16.99    2.05
  -4   2   1   16.34    3.20
   2  -4   1    8.05    2.54
   2  -4   1    9.70    1.65
  -4   2   1   14.19    2.10
  -3  -2  -1    2.11    2.38
   5  -3  -1    1.02    1.51
   2  -5   1    1.57    1.14
   2  -5   1    2.07    1.90
  -5   3   1   -0.31    1.84
   4  -3  -1    1.12    1.30
  -3  -1  -1    0.73    2.07
  -3  -1  -1   -0.11    0.98
   1  -4   1    0.13    0.73
   1  -4   1    0.42    1.34
  -4   3   1    0.07    1.68
   3  -3  -1   25.34    2.38
   3  -3  -1   38.87    1.94
   2  -3  -1    2.27    0.97
  -3   1  -1    3.66    2.15
  -3   1  -1    2.14    1.28
   2  -3  -1    3.13    1.71
  -1  -2   1    0.96    0.60
   3  -1   1    0.57    0.84
  -1  -2   1    1.43    1.07
   1  -3  -1    0.70    1.09
   1  -3  -1    1.37    0.67
  -3   2  -1    1.99    1.46
  -3   2  -1    2.19    1.98
  -2  -1   1    1.21    0.86
   3  -2   1    0.22    0.97
  -2  -1   1    0.54    1.48
  -3   3  -1   56.35    3.35
   3  -3   1   36.00    2.72
  -4   1   1    1.26    1.42
   3  -4   1    0.61    1.21
  -4   1   1    2.46    2.46
  -2  -3  -1    0.62    0.92
  -2  -3  -1    2.07    1.83
  -5   2   1    2.25    3.00
   3  -5   1    0.46    1.31
  -3  -3  -1   18.83    3.32
   3  -6   1   61.98    3.51
  -4  -2  -1    1.24    2.87
   2  -6   1    1.29    1.23
   5  -4  -1   23.29    3.07
  -4  -1  -1   13.71    3.93
  -5   4   1   17.83    3.06
   4  -4  -1    3.88    1.66
  -4   0  -1    0.17    2.67
  -4   4   1    2.46    2.29
   3  -4  -1    0.79    1.23
  -4   1  -1    1.54    2.47
  -4   1  -1    1.00    1.50
   2  -4  -1   10.42    2.48
  -4   2  -1   21.40    3.55
   2  -4  -1   14.04    1.69
  -4   2  -1   20.02    2.34
   4  -2   1   14.64    1.90
  -2  -2   1   11.62    2.39
  -2  -2   1   13.92    1.56
  -4   3  -1    1.51    1.94
   1  -4  -1   -0.17    0.66
   4  -3   1    2.44    1.39
  -3  -1   1    1.70    2.10
  -3  -1   1    0.77    1.07
  -4   4  -1    1.36    2.22
   4  -4   1    1.97    1.52
  -4   0   1   -1.65    2.49
   4  -5   1   22.00    2.80
  -5   1   1   11.35    3.88
  -2  -4  -1    0.47    1.65
  -2  -4  -1   -0.77    1.05
   4  -6   1    1.06    1.72
  -5  -1  -1    1.55    3.69
  -5   0  -1   -3.36    3.05
   5  -5  -1    0.51    1.83
   4  -5  -1   22.35    2.84
  -5   1  -1   13.26    4.01
  -5   2  -1   -1.05    2.68
   3  -5  -1    1.53    1.35
  -2  -3   1    1.71    1.02
  -2  -3   1    1.67    1.67
   2  -5  -1    1.82    1.10
   2  -5  -1    0.06    1.79
  -3  -2   1    0.50    2.11
   5  -3   1    0.13    1.49
  -4  -1   1   12.77    3.70
   5  -4   1   13.35    2.44
   5  -5   1    1.41    1.87
  -5   0   1   -1.41    3.25
   5  -6   1    0.89    2.04
   1  -7   1    0.39    2.14
   5  -6  -1    1.28    2.01
  -6   2  -1    0.51    1.84
   4  -6  -1    2.81    1.95
  -2  -4   1    1.75    1.68
   3  -6  -1   64.01    3.54
  -3  -3   1   33.32    4.04
   2  -6  -1    0.92    1.18
  -4  -2   1   -1.34    2.54
  -5  -1   1   -0.69    3.23
   0  -7   1    0.08    2.43
   5  -7  -1   14.44    3.19
   4  -7  -1    3.82    2.12
  -7   3  -1    1.58    2.19
   3  -7  -1    3.71    1.72
  -4  -3   1    1.23    2.59
  -5  -2   1    4.02    3.54
  -8   4  -1    6.44    2.80
   0   0  -2  638.18   17.92
   0   0   2  642.01   17.84
   1  -1  -2    2.53    0.80
  -1   0  -2    2.02    0.69
  -1   0  -2    3.62    1.11
  -1   0  -2    0.65    0.50
  -1   0  -2    1.53    0.78
   1  -1  -2    2.47    1.53
   1  -1  -2   -0.19    0.92
   0  -1   2    0.42    0.46
   1   0   2    2.09    0.60
   0  -1   2    1.48    1.04
   0  -1   2    1.64    0.96
  -1   1   2    0.44    0.87
  -1   1  -2    1.98    1.41
  -1   1  -2    5.08    0.93
   0  -1  -2    1.86    0.53
   1   0  -2    0.17    0.92
   0  -1  -2    2.22    0.50
   1  -1   2    2.39    1.51
   1  -1   2    4.49    0.87
   1  -1   2    3.11    0.63
  -1   0   2    1.63    1.25
  -1   0   2    0.96    0.85
   2  -1  -2   82.83    3.08
  -1  -1  -2   75.68    3.30
  -1  -1  -2   78.04    2.32
  -1  -1  -2   78.94    2.67
  -2   1   2   77.07    4.01
   1  -2   2   74.65    3.61
  -2   1   2   79.18    3.20
   1  -2   2   80.32    2.83
   3  -2  -2    1.85    1.08
  -2  -1  -2    3.24    0.92
  -2  -1  -2    1.72    1.54
  -2  -1  -2    2.76    0.80
   1  -3   2    1.49    1.41
   1  -3   2    2.34    0.73
  -3   2   2    1.88    1.33
  -3   2   2    1.17    1.81
   2  -2  -2    6.26    1.98
  -2   0  -2    5.93    0.90
  -2   0  -2    6.70    1.80
   2  -2  -2    6.23    1.09
   2  -2  -2    4.85    1.24
  -2   2   2    7.48    1.40
   0  -2   2    7.02    0.83
   0  -2   2    5.66    0.92
  -2   2   2    5.87    1.55
   2   0   2    4.60    0.76
   1  -2  -2   75.33    2.82
  -2   1  -2   79.97    3.23
  -2   1  -2   76.25    4.31
   2  -1   2   81.42    3.05
  -1  -1   2   83.62    2.84
  -1  -1   2   84.59    3.53
  -2   2  -2    6.01    1.28
  -2   2  -2    7.05    1.97
   2   0  -2    6.63    1.06
  -2   0   2    6.05    1.04
   2  -2   2    6.09    0.97
   2  -2   2    5.67    1.04
  -2   0   2    7.40    1.84
   2  -2   2    4.42    1.55
   3  -1  -2    2.63    1.05
  -1  -2  -2    2.67    0.84
  -1  -2  -2    2.93    0.63
  -1  -2  -2    0.79    0.99
   2  -3   2    2.30    1.00
  -3   1   2    2.40    1.32
  -3   1   2    3.70    2.11
   2  -3   2    3.64    1.86
  -2  -2  -2   63.74    2.75
   4  -2  -2   68.80    3.40
  -2  -2  -2   69.57    4.57
   2  -4   2   59.45    3.06
  -4   2   2   66.82    3.54
  -4   2   2   66.22    5.20
   2  -4   2   48.37    4.00
  -3  -2  -2    5.25    2.63
   5  -3  -2    1.66    1.61
   2  -5   2    1.07    2.03
  -5   3   2   -1.05    1.80
   2  -5   2    2.33    1.18
   4  -3  -2    2.43    1.41
  -3  -1  -2    2.19    2.25
   1  -4   2    0.80    1.52
  -4   3   2    5.89    1.94
   1  -4   2    2.37    0.82
   1  -4   2    2.19    1.31
   3  -3  -2  391.57    9.41
  -3   0  -2  404.34   13.67
  -3   0  -2  408.26   11.80
   3  -3  -2  364.99   11.93
  -3   3   2  397.41   10.67
   0  -3   2  407.28    7.08
  -3   1  -2    1.78    1.25
  -3   1  -2    0.78    1.93
   2  -3  -2    1.62    1.71
   2  -3  -2    1.74    0.96
  -1  -2   2    1.61    1.18
   3  -1   2    2.32    1.00
  -1  -2   2    2.58    0.77
  -3   2  -2    3.45    2.10
   1  -3  -2    2.44    0.75
  -3   2  -2    3.29    1.55
  -2  -1   2    1.79    1.58
   3  -2   2    1.71    1.10
  -2  -1   2    2.88    0.96
  -3   3  -2  382.56   10.59
  -3   0   2  408.69   13.65
   3  -3   2  399.97   12.12
  -4   1   2    2.71    2.49
   3  -4   2    1.89    1.29
  -2  -3  -2    1.23    1.08
  -2  -3  -2    0.62    1.87
  -5   2   2    3.15    2.98
   3  -5   2    0.26    1.32
  -5   2   2    2.60    1.80
  -3  -3  -2  130.66    6.88
   3  -6   2  119.99    5.36
  -4  -2  -2   -0.13    2.93
   2  -6   2    0.03    1.21
  -4  -1  -2   46.46    5.47
   5  -4  -2   53.47    3.79
  -5   4   2   50.11    4.12
   1  -5   2   34.76    3.16
  -4   0  -2    8.86    3.28
   4  -4  -2   11.39    2.18
  -4   4   2    9.05    2.53
  -4   1  -2    2.52    1.61
   3  -4  -2    2.42    1.36
  -4   1  -2    6.62    2.85
  -1  -3   2    2.59    1.28
  -4   2  -2   65.71    3.68
   2  -4  -2   66.21    3.16
  -4   2  -2   66.83    5.24
   2  -4  -2   63.10    4.10
  -2  -2   2   68.43    2.89
   4  -2   2   64.89    3.38
  -2  -2   2   67.61    4.27
   1  -4  -2    2.25    1.31
  -4   3  -2    1.73    1.95
   1  -4  -2    2.45    0.80
  -3  -1   2    1.04    2.15
   4  -3   2    1.72    1.44
  -4   4  -2    9.36    2.51
   4  -4   2   10.57    2.14
  -4   0   2   11.75    3.47
   4  -5   2   50.31    3.56
  -5   1   2   44.49    5.62
  -2  -4  -2    1.12    1.71
   4  -6   2    1.91    1.84
  -5  -1  -2   -1.70    3.47
  -5   0  -2    3.07    3.48
   5  -5  -2    0.27    1.78
  -5   1  -2   45.11    5.85
   4  -5  -2   51.50    3.60
  -5   2  -2    0.84    2.89
   3  -5  -2    2.61    1.45
  -2  -3   2    1.23    1.05
  -2  -3   2    0.67    1.75
   2  -5  -2    1.65    1.13
   2  -5  -2    1.94    2.01
   5  -3   2    1.37    1.62
  -3  -2   2    1.51    2.13
  -4  -1   2   48.62    5.26
   5  -4   2   50.34    3.86
  -5   0   2   -0.09    3.28
   1  -7   2    0.05    2.11
   5  -6  -2    1.83    2.25
  -6   2  -2    1.92    1.90
   4  -6  -2    2.47    1.90
   3  -6  -2  110.08    4.92
  -3  -3   2  119.61    6.08
   2  -6  -2    1.46    1.21
  -4  -2   2    0.11    2.59
  -5  -1   2   -0.03    3.25
   0  -7   2    1.86    2.50
   5  -7  -2   25.89    3.84
   4  -7  -2    3.81    2.12
  -7   3  -2    2.84    2.30
   3  -7  -2    4.31    1.82
  -4  -3   2    3.58    2.68
  -5  -2   2   18.08    4.44
  -8   4  -2    8.91    2.91
   0   0  -3    0.87    1.02
   0   0   3    1.67    0.94
  -1   0  -3    0.07    1.25
  -1   0  -3    0.56    0.71
  -1   0  -3    0.47    0.87
  -1   0  -3    0.06    0.45
   1  -1  -3    0.71    0.83
   1   0   3   -0.23    0.59
   0  -1   3   -0.86    1.02
  -1   1   3    0.72    0.94
  -1   1   3    0.44    1.46
   0  -1   3    0.93    1.13
  -1   1  -3    1.63    1.37
   0  -1  -3    0.04    0.89
   0  -1  -3   -0.17    0.46
  -1   1  -3    0.92    0.99
   1   0  -3   -0.31    0.94
   0  -1  -3    1.00    0.77
  -1   0   3    0.88    1.37
   1  -1   3    0.33    0.76
  -1   0   3   -0.90    0.87
   2  -1  -3  320.03    9.56
  -1  -1  -3  324.63    6.81
  -1  -1  -3  327.35    9.77
  -1  -1  -3  348.24    9.25
   1  -2   3  307.38   10.10
   1  -2   3  324.67    9.36
  -2   1   3  315.39    8.34
  -2   1   3  301.61   10.36
  -2  -1  -3   22.06    1.81
   3  -2  -3   13.36    1.78
  -2  -1  -3   16.69    1.61
  -2  -1  -3   23.13    2.61
   1  -3   3   18.82    2.20
   1  -3   3   19.32    1.64
  -3   2   3   20.07    2.08
  -3   2   3   18.01    2.70
   2  -2  -3    1.11    1.71
  -2   0  -3   -0.02    0.50
   2  -2  -3   -1.97    1.32
  -2   0  -3    0.97    0.82
  -2   0  -3    0.65    0.90
  -2   0  -3    0.46    1.38
   2  -2  -3   -0.29    0.88
   0  -2   3   -0.02    0.64
  -2   2   3    0.18    1.08
   2   0   3    0.02    0.63
   0  -2   3    0.80    0.92
   0  -2   3   -0.25    0.97
  -2   1  -3  336.02    8.39
   1  -2  -3  297.70    9.37
  -2   1  -3  327.94   10.80
  -1  -1   3  337.74   10.11
   2  -1   3  317.06    9.55
  -1  -1   3  343.70    9.45
  -2   2  -3    0.67    1.23
  -2   2  -3    1.52    1.65
   0  -2  -3   -0.12    0.68
   0  -2  -3    0.04    0.54
   2   0  -3   -0.71    0.91
   2  -2   3    1.82    0.95
  -2   0   3    0.21    0.86
  -2   0   3    0.36    1.45
  -1  -2  -3   18.37    1.41
   3  -1  -3   20.12    1.86
  -1  -2  -3   19.09    1.58
  -1  -2  -3   16.65    2.06
  -2   3  -3   15.69    1.57
  -3   1   3   18.10    2.81
   2  -3   3   15.30    1.80
   2  -3   3   17.19    2.54
  -3   1   3   22.97    2.07
   4  -2  -3   85.02    3.91
  -2  -2  -3   85.14    4.84
  -2  -2  -3   72.83    3.27
  -4   2   3   80.51    5.63
  -4   2   3   76.95    3.90
   2  -4   3   80.84    3.46
   2  -4   3   68.80    4.68
  -3  -2  -3    6.49    2.79
   2  -5   3    6.34    1.40
  -5   3   3    3.20    1.99
   4  -3  -3    3.63    1.50
  -3  -1  -3    5.75    2.54
   1  -4   3    6.27    1.98
  -4   3   3    5.69    1.95
   1  -4   3    5.69    1.08
  -3   0  -3   -0.68    1.87
   3  -3  -3    2.17    1.16
   3  -3  -3   12.22    1.68
   0  -3   3   17.80    1.81
  -3   3   3    7.88    1.67
   0  -3   3    2.65    1.04
  -3   1  -3   23.54    3.24
  -3   1  -3   22.86    2.32
   2  -3  -3   14.70    1.75
   2  -3  -3   18.48    2.40
  -1  -2   3   21.09    2.36
  -1  -2   3   18.35    1.53
   3  -1   3   18.05    1.65
  -3   2  -3   20.14    3.01
  -3   2  -3   21.53    2.21
   1  -3  -3   14.65    1.45
   3  -2   3   18.47    1.97
  -2  -1   3   23.30    2.67
  -2  -1   3   20.56    1.70
  -3   3  -3    3.35    1.59
   3  -3   3    2.68    1.23
  -3   0   3    1.11    1.94
  -1  -3  -3    5.44    0.95
  -1  -3  -3    5.96    1.46
  -4   1   3    4.45    2.62
   3  -4   3    6.00    1.51
  -2  -3  -3    4.88    1.23
  -2  -3  -3    4.95    2.26
   3  -5   3    4.22    1.59
  -5   2   3    4.21    1.83
  -5   2   3    3.35    3.06
  -3  -3  -3    4.33    2.75
   3  -6   3   31.42    2.93
  -4  -2  -3    4.86    3.42
   2  -6   3    6.85    1.59
  -4  -1  -3   35.44    5.07
   5  -4  -3   49.34    3.71
   1  -5   3   33.87    2.23
   1  -5   3   33.96    3.50
  -5   4   3   39.83    3.83
   4  -4  -3   -0.74    1.34
  -4   0  -3    0.34    2.59
  -4   4   3   -1.05    2.92
  -4   1  -3    4.67    1.67
  -4   1  -3    5.60    2.87
  -1  -3   3    3.92    1.03
   2  -4  -3   93.16    3.68
   2  -4  -3   85.22    4.59
  -4   2  -3   77.98    3.99
  -4   2  -3   82.61    5.85
  -2  -2   3   78.88    4.68
   4  -2   3   78.31    3.90
  -2  -2   3   79.43    3.36
   1  -4  -3    5.90    1.04
  -4   3  -3    3.98    2.16
   4  -3   3    5.11    1.64
  -3  -1   3    4.64    2.40
  -4   4  -3   -0.81    1.95
   4  -4   3    0.12    1.37
  -4   0   3   -2.42    2.38
  -5   1   3   34.95    5.25
   4  -5   3   38.97    3.26
  -2  -4  -3    5.62    2.22
   4  -6   3    5.15    2.06
   5  -5  -3   -0.17    1.78
   4  -5  -3   46.88    3.41
  -1  -4   3   31.45    2.92
   3  -5  -3    5.77    1.61
  -2  -3   3    4.78    1.99
  -2  -3   3    4.83    1.29
   2  -5  -3    3.94    1.27
   2  -5  -3    6.31    2.25
  -3  -2   3    4.88    2.44
   1  -5  -3   46.27    2.38
  -4  -1   3   42.57    5.10
  -5   0   3    1.41    3.31
   5  -6  -3    5.80    2.36
   4  -6  -3    5.28    2.08
  -6   2  -3    2.88    2.07
   3  -6  -3   28.81    2.69
   2  -6  -3    4.82    1.45
  -4  -2   3    4.92    2.83
  -5  -1   3    8.05    3.91
   0  -7   3    3.62    2.39
   5  -7  -3   22.93    3.68
  -7   3  -3    0.03    2.20
   4  -7  -3    1.18    2.01
  -4  -3   3   -0.51    2.43
  -5  -2   3    8.24    3.57
  -8   4  -3    2.36    2.73
   0   0  -4  836.27   24.46
   0   0   4  921.71   24.43
  -1   0  -4    0.65    0.88
   1  -1  -4    0.65    0.91
  -1   0  -4    0.03    1.32
  -1   1   4   -0.66    1.01
   0  -1   4    0.49    1.24
  -1   1   4    0.92    1.52
   1   0   4    0.53    0.71
   0  -1   4    0.24    1.14
  -1   1  -4    0.20    1.40
  -1   1  -4    0.70    1.07
   0  -1  -4   -0.07    0.89
   0  -1  -4    0.66    0.49
   0  -1  -4    0.58    1.04
   1   0  -4    0.98    1.10
   1  -1   4    0.72    0.85
  -1   0   4    1.00    1.48
  -1  -1  -4  317.10    8.84
  -1  -1  -4  307.04    9.41
  -1  -1  -4  300.88    6.43
   2  -1  -4  297.18    9.16
   1  -2   4  294.88    8.95
  -2   1   4  311.79   10.15
  -2   1   4  290.86    7.94
   1  -2   4  294.66    9.75
   3  -2  -4    2.01    1.16
  -2  -1  -4    1.81    0.98
  -2  -1  -4    2.58    0.78
  -2  -1  -4    2.16    1.54
  -3   2   4    1.91    1.92
   1  -3   4    1.41    1.65
  -3   2   4    2.14    1.40
   1  -3   4    1.71    0.91
  -2   0  -4    0.98    0.53
   2  -2  -4    1.72    1.03
  -2   0  -4    1.37    0.90
  -2   0  -4    0.44    1.41
   2  -2  -4   -0.36    1.44
  -2   0  -4    0.66    0.96
   0  -2   4    0.19    1.00
   2   0   4    0.77    0.72
   0  -2   4    0.90    1.11
  -2   2   4    1.27    1.12
  -2   2   4    1.20    1.62
  -2   1  -4  273.37    9.73
  -2   1  -4  296.62    7.63
   1  -2  -4  271.21    8.52
   1  -2  -4  260.71    9.03
   2  -1   4  302.31    8.73
  -1  -1   4  319.47    8.66
   0  -2  -4    1.09    0.96
  -2   2  -4   -0.08    1.61
  -2   2  -4    3.39    1.33
   0  -2  -4    1.13    0.75
   2   0  -4    2.31    1.16
  -2   0   4    1.77    1.69
   2  -2   4    1.51    0.96
  -1  -2  -4    2.49    0.81
  -1  -2  -4    1.51    0.83
  -2   3  -4    0.59    1.27
  -1  -2  -4    2.88    1.16
   3  -1  -4    2.71    1.20
   2  -3   4    1.21    1.92
  -3   1   4    2.15    1.98
   2  -3   4    1.45    0.98
  -2  -2  -4  164.87    6.75
   4  -2  -4  160.34    5.93
  -2  -2  -4  149.04    5.25
   2  -4   4  148.87    5.38
   2  -4   4  143.78    6.86
  -4   2   4  150.94    5.55
  -4   2   4  162.94    7.76
  -3  -2  -4    1.53    2.46
  -5   3   4    1.55    1.96
   4  -3  -4    2.13    1.47
  -3  -1  -4    1.42    2.22
  -4   3   4    1.70    1.74
   1  -4   4    1.65    1.82
   1  -4   4    0.82    1.05
   3  -3  -4  164.33    6.27
  -3   0  -4  178.36    4.22
  -3   0  -4  194.15    7.93
   3  -3  -4  185.63    4.81
  -3   3   4  177.46    5.92
   0  -3   4  171.86    6.00
   0  -3   4  179.40    6.08
   2  -3  -4    1.43    1.70
  -3   1  -4    2.51    1.35
  -3   1  -4    2.19    1.95
   2  -3  -4    1.01    1.01
  -1  -2   4    1.84    0.98
   3  -1   4    2.26    1.01
  -2   3   4    0.89    1.84
  -3   2  -4    4.29    2.12
  -3   2  -4    2.66    1.50
   1  -3  -4    1.64    0.84
   1  -3  -4    2.16    1.51
  -2  -1   4    1.98    1.63
  -2  -1   4    2.24    1.00
   3  -2   4    2.98    1.10
  -3   3  -4  179.79    7.64
  -3   3  -4  185.15    6.01
   0  -3  -4  170.26    5.80
   0  -3  -4  180.24    5.68
   3  -3   4  186.79    6.49
  -3   0   4  198.81    8.07
  -1  -3  -4    0.40    0.87
  -1  -3  -4    0.60    1.29
  -4   1   4    0.06    2.32
   3  -4   4    0.54    1.22
  -2  -3  -4    0.74    2.06
  -2  -3  -4    1.41    1.18
   3  -5   4    0.76    1.28
  -5   2   4    1.91    2.95
  -3  -3  -4   53.76    5.33
   3  -6   4   43.67    3.36
  -4  -2  -4    0.17    3.25
   2  -6   4    1.12    1.35
   5  -4  -4   93.28    4.98
  -4  -1  -4   85.99    6.68
  -5   4   4   84.43    4.92
   1  -5   4   78.85    3.52
   1  -5   4   86.87    4.95
   4  -4  -4    1.69    1.54
  -4   0  -4    1.39    2.61
   0  -4   4    0.79    1.50
   0  -4   4    0.14    1.38
  -4   4   4   -0.11    2.93
  -4   1  -4    0.10    1.49
  -4   1  -4    1.57    2.42
   3  -4  -4    1.45    1.31
  -1  -3   4    0.56    1.03
  -4   2  -4  152.23    5.70
   2  -4  -4  155.55    5.53
  -4   2  -4  161.71    7.99
   2  -4  -4  145.78    6.42
  -2  -2   4  162.08    6.75
  -2  -2   4  157.63    5.38
   4  -2   4  152.37    5.92
  -4   3  -4    0.38    1.89
   1  -4  -4   -0.18    0.87
   4  -3   4   -0.16    1.30
  -3  -1   4   -0.22    2.06
  -4   4  -4    3.03    2.08
  -4   0   4   -0.39    2.48
   4  -4   4    1.63    1.50
  -5   1   4   98.14    7.08
  -2  -4  -4    1.03    2.13
   5  -5  -4   -0.51    1.77
   4  -5  -4   90.80    4.65
  -1  -4   4   78.19    4.19
  -1  -4   4   81.70    3.53
  -5   2  -4    0.38    1.73
   3  -5  -4    2.16    1.43
   2  -5  -4    1.13    1.16
  -3  -2   4    1.45    2.21
  -5   4  -4   98.31    5.88
  -4  -1   4   89.31    6.44
  -5   0   4    1.94    3.19
  -6   1   4    0.08    3.71
   5  -7   4   29.87    3.91
   5  -6  -4    2.40    2.17
  -6   2  -4   -0.79    1.94
   4  -6  -4    1.89    1.89
   3  -6  -4   43.53    3.10
  -3  -3   4   46.28    4.40
   2  -6  -4    0.84    1.33
  -4  -2   4    1.91    2.74
  -6   5  -4    3.51    3.16
  -5  -1   4   -0.50    3.28
   5  -7  -4   33.27    3.75
  -7   3  -4   -0.91    2.21
   4  -7  -4    0.22    1.86
  -4  -3   4   -0.03    2.51
  -5  -2   4   30.76    5.17
  -8   4  -4    9.41    3.12
   0   0  -5    1.32    1.35
   0   0   5    0.67    1.17
   1  -1  -5    0.01    0.95
   0   1  -5    0.39    1.40
  -1   0  -5   -0.69    1.19
  -1   0  -5   -0.35    0.92
   1  -1  -5    0.40    0.59
  -1   1   5    0.61    1.06
  -1   1   5   -0.02    1.43
   0  -1   5    0.76    1.31
   0  -1   5    0.47    1.24
   1   0   5    0.55    0.78
  -1   1  -5   -0.08    1.11
  -1   1  -5    0.42    1.46
   0  -1  -5    0.48    1.19
   1   0  -5   -0.38    1.14
   0  -1  -5   -0.46    0.48
   0  -1  -5    0.23    1.04
  -1   0   5   -0.60    1.54
   1  -1   5    0.14    0.90
  -1  -1  -5  154.10    5.89
  -1  -1  -5  160.39    5.33
   2  -1  -5  158.24    5.62
  -2   1   5  170.05    5.01
   1  -2   5  163.65    6.27
   1  -2   5  174.09    5.57
  -2  -1  -5    3.58    1.00
  -2  -1  -5    4.18    0.82
   3  -2  -5    3.64    1.36
  -2  -1  -5    3.27    1.69
   1  -3   5    4.49    1.92
   1  -3   5    4.42    1.15
  -3   2   5    4.38    1.55
  -2   0  -5   -0.06    0.48
   2  -2  -5   -0.19    1.04
  -2   0  -5   -1.09    0.99
   2  -2  -5   -0.52    1.57
  -2   0  -5    0.72    1.44
  -2   2   5    1.03    1.65
  -2   2   5   -0.64    1.12
   2   0   5    0.22    0.69
   0  -2   5   -0.63    1.19
   0  -2   5   -0.24    1.04
   1  -2  -5  154.61    5.32
   1  -2  -5  150.21    6.00
  -2   1  -5  160.58    6.59
  -2   1  -5  167.64    5.00
  -1   2   5  152.74    4.52
  -1  -1   5  163.80    6.14
   2  -1   5  166.42    5.40
  -1  -1   5  158.99    5.34
   0  -2  -5   -0.60    1.05
  -2   2  -5    2.18    1.32
   2   0  -5    0.64    1.16
   0  -2  -5    0.40    0.85
  -2   2  -5    0.55    1.67
   2  -2   5    0.53    0.91
  -2   0   5    0.65    1.51
   3  -1  -5    2.93    1.23
  -2   3  -5    2.65    1.45
  -1  -2  -5    4.75    1.39
  -1  -2  -5    5.03    1.01
  -3   1   5    4.51    2.13
   2  -3   5    4.15    2.21
   2  -3   5    3.20    1.17
   4  -2  -5   38.42    2.86
  -2  -2  -5   36.21    3.81
  -2  -2  -5   37.65    2.59
   2  -4   5   38.10    2.61
   2  -4   5   46.00    4.45
  -4   2   5   39.50    3.07
  -4   2   5   40.60    4.32
  -3  -2  -5    3.04    2.64
  -5   3   5    4.31    2.09
  -3  -1  -5    0.23    2.16
   4  -3  -5    1.59    1.47
   1  -4   5    0.02    1.95
  -4   3   5    0.77    1.72
   1  -4   5    0.89    1.20
  -3   0  -5    0.28    0.70
   3  -3  -5   -0.38    1.16
   3  -3  -5    3.89    1.73
  -3   0  -5    0.71    1.85
   0  -3   5   -0.99    1.29
   0  -3   5    0.91    1.20
  -3   3   5   -0.07    1.44
   2  -3  -5    4.60    1.95
  -3   1  -5    3.71    1.98
  -3   1  -5    4.55    1.53
  -3   1  -5    3.52    0.54
   2  -3  -5    4.52    1.29
  -1  -2   5    4.86    1.65
  -2   3   5    4.62    1.82
   3  -1   5    3.95    1.14
  -1  -2   5    2.78    1.13
  -3   2  -5    3.91    1.58
   1  -3  -5    4.92    1.09
  -3   2  -5    6.05    2.24
   1  -3  -5    5.63    1.80
  -2  -1   5    3.25    1.83
   3  -2   5    3.77    1.26
  -2  -1   5    4.36    1.10
  -3   3  -5    0.61    1.44
   0  -3  -5    0.41    0.95
   0  -3  -5    1.15    1.15
   3  -3   5    1.09    1.15
  -3   0   5   -0.60    1.94
  -1  -3  -5    1.56    1.07
  -1  -3  -5    1.19    1.48
   3  -4   5    2.58    1.32
  -4   1   5    0.07    2.43
  -2  -3  -5    2.46    2.26
  -3  -3  -5    0.33    2.76
   3  -6   5    2.27    1.53
  -4  -3  -5   -1.84    3.09
   3  -7   5    1.44    1.74
  -4  -2  -5    2.29    3.29
   2  -6   5    2.39    1.52
   5  -4  -5   33.19    3.36
  -4  -1  -5   22.02    4.30
   1  -5   5   34.64    2.53
  -5   4   5   20.97    3.16
   4  -4  -5   -0.82    1.46
  -4   0  -5   -0.36    2.53
  -4   4   5    1.13    2.07
   0  -4   5   -0.80    1.42
   0  -4   5    1.12    1.60
  -4   1  -5   -0.60    1.46
   3  -4  -5    1.35    1.43
  -1  -3   5    0.38    1.61
  -1  -3   5    2.42    1.25
   2  -4  -5   44.79    2.82
   2  -4  -5   44.31    3.76
  -4   2  -5   37.62    3.50
  -4   2  -5   46.67    4.89
   4  -2   5   36.68    2.79
  -2  -2   5   38.93    2.55
  -4   3  -5    0.63    1.99
   1  -4  -5    0.77    1.04
  -3  -1   5    0.77    2.26
  -4   4  -5   -0.78    2.00
   0  -4  -5    0.65    1.67
   0  -4  -5    1.68    1.28
  -4   0   5    1.07    2.60
  -1  -4  -5   18.51    2.61
  -1  -4  -5   27.02    2.70
  -5   1   5   25.00    4.72
  -2  -4  -5    0.52    2.37
  -3  -4  -5    1.47    2.87
   4  -7   5    0.59    2.23
   2  -7   5    8.50    1.81
   1  -6   5    4.87    1.44
   5  -5  -5   -0.26    1.81
   0  -5   5   -1.99    1.74
   0  -5   5   -1.63    1.56
   4  -5  -5   40.57    3.34
  -1  -4   5   28.53    3.23
  -1  -4   5   23.45    2.35
  -5   2  -5    4.35    1.92
   3  -5  -5    3.53    1.55
   2  -5  -5    3.54    1.38
  -5   3  -5    1.84    2.09
  -3  -2   5    0.47    2.36
  -5   4  -5   24.86    3.55
  -4  -1   5   21.58    4.08
  -5   0   5    3.81    3.43
  -6   1   5    4.75    4.11
   5  -7   5   15.13    3.31
   5  -6  -5    7.81    2.58
  -1  -5   5    2.50    2.11
   4  -6  -5    2.91    1.91
  -6   2  -5    1.80    2.00
   3  -6  -5    5.37    1.72
  -4  -2   5    2.08    2.92
  -6   5  -5    2.60    3.49
  -5  -1   5    8.16    3.83
   6  -7   5    4.99    2.90
   5  -7  -5   18.17    3.23
  -2  -5   5    6.90    2.53
   4  -7  -5    1.85    2.13
  -7   3  -5    0.65    2.32
  -5  -2   5    7.63    3.71
   0   0  -6  144.21    5.59
   0   0   6  151.23    5.46
   1  -1  -6    3.23    1.20
   0   1  -6    3.75    1.73
  -1   0  -6    2.21    1.43
  -1   0  -6    2.51    0.99
   1  -1  -6    3.41    0.64
   0  -1   6    3.57    1.51
   0  -1   6    2.60    1.41
  -1   1   6    3.94    1.70
   1   0   6    3.27    1.02
   0  -1  -6    1.76    0.55
   0  -1  -6    3.84    1.50
   1   0  -6    3.09    1.42
   0  -1  -6    2.32    0.82
  -1   1  -6    2.73    1.72
  -1   1  -6    3.39    1.35
   0  -1  -6    1.58    1.10
   0   1   6    1.74    0.99
  -1   0   6    4.78    1.87
   1  -1   6    2.80    1.13
  -1  -1  -6  347.71   10.81
  -1  -1  -6  367.77   11.48
   2  -1  -6  359.96   11.15
   1  -2   6  376.06   11.80
  -2   1   6  354.36   11.89
   1  -2   6  391.39   11.07
  -2  -1  -6   -0.43    1.49
  -2  -1  -6    0.84    0.73
  -2  -1  -6    1.13    1.08
   3  -2  -6    0.17    1.23
   1  -3   6   -1.05    1.02
   1  -3   6   -0.05    1.69
  -3   2   6   -0.14    1.36
   2  -2  -6    3.22    1.69
   2  -2  -6    4.23    1.36
  -2   0  -6    3.42    1.18
  -2   0  -6    4.35    1.74
  -2   0  -6    4.63    0.58
  -2   2   6    4.35    1.89
   0  -2   6    2.73    1.35
  -2   2   6    3.43    1.37
   0  -2   6    4.13    1.50
   2   0   6    3.75    0.85
  -2   1  -6  368.94   12.27
   1  -2  -6  355.87   11.66
   1  -2  -6  373.56   11.04
  -2   1  -6  366.83    9.41
  -1  -1   6  384.27   11.77
  -1   2   6  375.18    9.32
  -1  -1   6  372.29   11.07
   2  -1   6  354.96   10.92
  -2   2  -6    2.29    1.79
   0  -2  -6    3.74    1.40
   2   0  -6    4.08    1.47
   0  -2  -6    4.86    1.21
  -2   2  -6    4.92    1.40
   2  -2   6    4.55    1.13
   3  -1  -6    0.55    1.20
  -2   3  -6   -0.36    1.37
  -1  -2  -6    0.00    1.03
  -1  -2  -6    0.07    1.26
   2  -3   6    0.06    1.06
   2  -3   6    0.13    2.06
  -2  -2  -6  159.91    7.08
  -2  -2  -6  164.61    5.83
   4  -2  -6  171.41    6.44
   2  -4   6  162.78    5.94
  -4   2   6  147.83    5.61
  -3  -2  -6    2.69    2.68
  -5   3   6    2.13    1.96
   2  -5   6    3.88    1.45
  -3  -1  -6    2.26    2.23
   4  -3  -6    2.61    1.63
  -4   3   6    2.65    1.83
   1  -4   6    2.57    1.38
   1  -4   6    3.23    2.10
   3  -3  -6    2.30    1.45
  -3   0  -6    4.19    0.79
  -3   0  -6    1.68    1.98
   3  -3  -6    2.92    1.45
   0  -3   6    1.59    1.40
   0  -3   6    2.11    1.61
  -3   3   6    4.18    1.67
  -3   1  -6   -0.01    0.47
   2  -3  -6   -0.36    1.09
   2  -3  -6   -0.71    1.72
  -3   1  -6    0.33    1.38
  -3   1  -6    0.47    1.80
  -2   3   6    1.60    1.86
  -1  -2   6   -0.29    1.12
   3  -1   6    0.38    0.96
  -1  -2   6    0.50    1.54
   1  -3  -6    0.16    1.73
  -3   2  -6   -1.56    1.38
  -3   2  -6    1.36    1.97
   1  -3  -6    0.95    1.00
  -2  -1   6   -0.54    0.99
   3  -2   6    0.83    1.16
  -3   3  -6    1.94    1.60
   0  -3  -6    2.89    1.53
   0  -3  -6    1.86    1.21
  -3   0   6    5.49    2.44
   3  -3   6    0.72    1.25
  -1  -3  -6    1.82    1.30
  -1  -3  -6    1.15    1.55
  -4   1   6    1.13    2.61
   3  -4   6    1.56    1.37
  -2  -3  -6    2.07    2.14
  -3  -3  -6    6.54    3.50
   3  -6   6   11.23    2.26
  -4  -3  -6    1.90    3.55
   3  -7   6    0.80    1.88
  -4  -2  -6    1.96    3.23
   2  -6   6    1.06    1.49
  -4  -1  -6  101.18    7.09
   5  -4  -6   91.24    5.19
   1  -5   6   98.24    4.34
  -5   4   6   88.59    5.11
  -4   0  -6    2.98    2.83
   4  -4  -6    3.51    1.74
   0  -4   6    3.28    1.75
   0  -4   6    1.80    1.87
  -4   4   6    3.80    2.21
  -4   1  -6    1.65    1.61
   3  -4  -6    2.06    1.52
  -1  -3   6    2.35    1.75
  -1  -3   6    2.01    1.34
   2  -4  -6  162.91    6.02
  -4   2  -6  167.69    6.20
  -4   2  -6  154.32    8.00
   1  -4  -6    2.79    2.12
  -4   3  -6    2.00    2.01
   1  -4  -6    2.34    1.25
  -3  -1   6    1.37    2.38
   0  -4  -6    3.72    1.54
   0  -4  -6    3.47    1.96
  -4   4  -6    4.31    2.25
  -4   0   6    2.52    2.76
  -1  -4  -6   83.08    5.01
  -1  -4  -6   82.36    4.26
  -5   1   6   89.61    6.74
  -2  -4  -6    0.49    2.56
  -3  -4  -6   -1.44    3.00
   4  -7   6    3.37    2.21
  -5  -2  -6   24.85    5.81
   2  -7   6   35.42    2.99
  -5  -1  -6   -1.86    3.60
   1  -6   6    1.85    1.46
   5  -5  -6    4.93    2.37
   0  -5   6    1.76    1.86
   4  -5  -6   90.30    4.81
  -1  -4   6   81.32    4.67
  -5   2  -6    4.14    1.94
   3  -5  -6    4.22    1.73
  -2  -3   6    1.67    2.23
  -5   3  -6    3.25    2.37
   2  -5  -6    3.15    1.46
  -5   4  -6   93.17    5.87
  -4  -1   6  104.11    6.94
   0  -5  -6    2.41    1.86
   0  -5  -6    6.11    2.59
  -5   0   6    4.06    3.49
  -2  -5  -6   27.54    3.70
   5  -7   6   39.08    4.25
  -6  -1  -6    2.04    4.94
   5  -6  -6    3.72    2.47
  -1  -5   6    0.68    2.17
   4  -6  -6   -0.08    1.85
  -6   2  -6    2.82    2.06
   3  -6  -6    7.81    2.06
  -6   5  -6    2.28    3.33
  -5  -1   6    2.07    3.46
   6  -7   6    1.11    2.64
   5  -7  -6   31.90    3.81
  -2  -5   6   31.73    3.45
   4  -7  -6    2.82    2.22
  -7   3  -6   -1.50    2.25
   0   0  -7    1.66    1.55
   0   0   7    1.41    1.35
  -1   0  -7    0.71    1.41
   1  -1  -7    0.21    0.52
   0   1  -7   -0.97    1.60
   1  -1  -7    0.01    1.14
  -1   0  -7   -0.07    0.92
   0  -1   7   -2.44    1.35
   1   0   7   -1.30    0.84
  -1   1   7   -1.76    1.42
   0  -1  -7   -0.43    0.73
  -1   1  -7    0.27    1.26
   0  -1  -7    0.70    1.43
   1   0  -7   -0.29    1.37
  -1   1  -7   -1.20    1.57
   0  -1  -7    0.71    1.12
   0  -1  -7    0.16    0.86
  -1   0   7    1.38    1.69
   1  -1   7   -0.46    1.07
   0   1   7   -0.64    0.94
   2  -1  -7   16.26    1.94
  -1  -1  -7   11.79    1.56
  -1  -1  -7   14.73    2.06
   1  -2   7   13.09    2.12
   1  -2   7   12.98    1.70
  -2   1   7   17.76    2.56
   3  -2  -7    2.34    1.43
  -2  -1  -7    2.12    1.25
  -2  -1  -7    0.74    1.67
   1  -3   7    1.54    1.25
   1  -3   7    2.61    1.99
  -3   2   7    0.10    1.34
  -3   2   7   -0.06    2.03
  -2   0  -7    0.05    1.56
  -2   0  -7   -0.04    1.15
   2  -2  -7    1.63    1.75
   2  -2  -7    0.18    1.20
   2  -2  -7   -0.17    0.81
   0  -2   7   -0.26    1.24
   2   0   7    0.35    0.80
  -2   2   7   -0.77    1.63
  -2   2   7    1.05    1.29
   0  -2   7   -0.50    1.38
  -2   1  -7   15.83    1.76
  -2   1  -7   12.30    2.40
   1  -2  -7   11.83    1.66
   1  -2  -7   12.93    2.12
  -1  -1   7   11.62    1.56
  -1  -1   7   15.30    2.26
   2  -1   7   15.39    1.83
  -1   2   7   12.39    1.62
  -2   2  -7   -0.05    1.67
   0  -2  -7    0.34    1.10
   2   0  -7   -0.21    1.41
  -2   2  -7   -0.53    1.35
   0  -2  -7    0.88    1.43
  -2   0   7    0.56    1.79
   2  -2   7    0.24    1.04
  -2   3  -7   -0.78    1.49
   3  -1  -7    1.80    1.37
  -1  -2  -7   -0.26    1.22
  -1  -2  -7    1.59    1.46
   2  -3   7    0.08    2.17
   2  -3   7    1.36    1.17
  -2  -2  -7    4.53    2.15
   4  -2  -7    5.94    1.79
   2  -4   7    7.33    1.62
  -3  -2  -7   -0.37    2.53
   2  -5   7   -0.85    1.34
  -5   3   7    0.16    1.81
  -3  -1  -7    1.60    2.31
   4  -3  -7   -1.62    1.41
   1  -4   7    1.17    1.42
  -4   3   7    0.69    1.72
  -3   0  -7    0.54    0.66
   3  -3  -7    0.15    1.48
   3  -3  -7   -2.80    1.60
  -3   0  -7    0.08    2.01
   0  -3   7    0.30    1.44
   0  -3   7   -0.52    1.53
  -3   3   7    0.71    1.58
  -3   1  -7    2.66    2.09
  -3   1  -7    1.18    1.46
   2  -3  -7    1.30    1.28
  -3   1  -7    2.17    0.53
   2  -3  -7   -0.85    2.00
  -2   3   7    1.47    2.00
  -1  -2   7    1.70    1.65
  -1  -2   7    1.15    1.28
  -3   2  -7    0.97    1.53
  -3   2  -7    2.15    2.10
   1  -3  -7    1.02    1.12
   1  -3  -7    1.84    1.99
   3  -2   7    1.44    1.22
  -2  -1   7    1.77    1.23
  -2  -1   7    1.71    2.08
  -3   3  -7   -2.25    1.60
   0  -3  -7    0.51    1.24
   0  -3  -7   -0.46    1.56
   3  -3   7   -0.07    1.18
  -1  -3  -7   -0.07    1.55
  -1  -3  -7    0.34    1.49
   3  -4   7    1.26    1.36
  -2  -3  -7    0.23    2.20
   3  -5   7   -0.21    1.41
  -3  -3  -7   -2.08    2.98
   3  -6   7    1.18    1.72
  -4  -3  -7   -0.76    3.60
   3  -7   7    1.02    1.88
  -4  -2  -7    1.43    3.44
   2  -6   7    0.05    1.54
   5  -4  -7    6.03    2.19
  -4  -1  -7    2.90    3.16
  -5   4   7    4.70    2.49
   1  -5   7    4.16    1.65
   4  -4  -7   -0.09    1.61
  -4   0  -7    0.08    2.61
   0  -4   7   -1.40    1.64
  -4   4   7    0.88    2.03
   3  -4  -7   -0.41    1.44
  -4   1  -7   -0.44    1.49
  -1  -3   7    1.10    1.81
  -4   2  -7    1.96    2.58
   2  -4  -7    5.10    1.57
  -4   2  -7    3.15    1.83
  -2  -2   7    7.68    2.47
   1  -4  -7   -0.37    1.27
  -4   3  -7   -2.45    1.83
   1  -4  -7    0.35    2.26
   4  -3   7   -1.05    1.28
  -4   4  -7    2.95    2.16
   0  -4  -7   -0.11    1.59
   0  -4  -7    2.27    2.14
  -1  -4  -7    3.21    2.19
  -5   1   7    5.20    3.33
  -2  -4  -7   -0.73    2.59
   4  -6   7   -0.28    1.78
  -3  -4  -7   -0.68    2.95
   4  -7   7   -0.08    2.00
  -5  -2  -7    0.64    4.32
   2  -7   7    4.48    1.78
  -5  -1  -7    2.01    3.96
   1  -6   7   -1.72    1.48
  -5   0  -7    1.36    3.28
   5  -5  -7    0.17    2.03
   0  -5   7    0.39    1.95
   4  -5  -7    5.59    2.17
  -1  -4   7    3.74    2.14
  -5   2  -7    0.81    1.82
   3  -5  -7   -0.55    1.52
  -2  -3   7    0.32    2.29
   2  -5  -7    1.41    1.45
  -5   3  -7    0.84    2.30
  -5   4  -7    1.14    2.54
   1  -5  -7    3.05    1.68
   0  -5  -7   -0.10    1.89
  -5   0   7   -0.57    3.26
  -1  -5  -7    0.46    2.39
  -2  -5  -7    2.12    2.78
   5  -7   7    2.89    2.45
  -6  -1  -7    2.16    4.97
   1  -7   7    0.32    1.39
  -6   0  -7    3.25    4.33
   0  -6   7    0.17    1.54
   5  -6  -7    2.27    2.44
  -1  -5   7   -0.54    2.16
  -6   2  -7    1.04    1.99
   4  -6  -7    1.60    2.07
   3  -6  -7    0.55    1.76
  -3  -3   7   -0.12    2.71
  -6   4  -7   -0.09    2.66
   1  -6  -7    1.48    2.11
  -6   5  -7   -2.85    3.04
   6  -7   7   -0.63    2.73
   5  -7  -7    6.36    2.91
  -2  -5   7    1.99    2.52
  -7   3  -7   -1.94    2.18
   2  -7  -7    1.51    2.39
   0   0  -8   53.43    2.94
   0   0  -8   48.57    3.51
   0   0   8   44.93    3.32
   0   1  -8   -1.38    1.70
   1  -1  -8   -0.39    0.46
  -1   0  -8    0.87    1.54
   1  -1  -8   -1.10    1.21
  -1   0  -8    0.64    1.10
   1   0   8   -0.71    0.91
   0  -1   8   -0.75    1.40
  -1   1   8    0.98    1.58
   0  -1  -8   -0.59    0.89
  -1   1  -8    1.40    1.84
   0  -1  -8    0.72    1.32
  -1   1  -8    0.07    1.29
   0  -1  -8   -1.97    1.52
   1   0  -8   -0.14    1.46
   0   1   8    0.45    1.05
  -1   0   8    0.56    1.76
   1  -1   8    0.17    1.16
  -1  -1  -8  318.53   10.46
  -1  -1  -8  340.76   11.10
   2  -1  -8  337.61   10.74
  -2   1   8  331.97   11.49
   1  -2   8  339.05   10.54
   3  -2  -8    2.58    1.59
  -2  -1  -8    3.96    2.04
  -3   2   8    2.34    2.24
   1  -3   8    4.97    2.27
   1  -3   8    2.41    1.43
   2  -2  -8    5.93    0.99
   2  -2  -8    6.04    1.61
  -2   0  -8    4.50    1.97
  -2   0  -8    3.85    1.34
   0  -2   8    4.13    1.62
  -2   2   8    4.59    1.49
   2   0   8    3.23    0.91
  -2   2   8    4.83    1.99
   0  -2   8    3.47    1.68
   1  -2  -8  286.94   10.92
  -2   1  -8  350.29   11.81
  -2   1  -8  330.75    8.78
   1  -2  -8  311.53   10.36
  -1   2   8  355.86    8.84
  -1  -1   8  341.85   11.09
   2  -1   8  330.98   10.19
  -2   2  -8    4.95    2.17
  -2   2  -8    4.60    1.65
   0  -2  -8    4.65    1.50
   2   0  -8    3.06    1.71
   0  -2  -8    5.09    1.79
   2  -2   8    6.43    1.43
  -2   0   8    5.64    2.18
  -1  -2  -8    1.72    1.52
  -2   3  -8    2.76    1.66
  -1  -2  -8    1.40    1.61
   3  -1  -8    2.38    1.61
  -3   1   8    1.49    2.25
   2  -3   8    5.08    1.47
  -2  -2  -8  168.99    7.66
   2  -4   8  170.99    6.48
  -3  -2  -8    8.58    3.23
   2  -5   8    4.80    1.77
   4  -3  -8    0.46    1.63
  -3  -1  -8    0.56    2.32
   1  -4   8    1.30    1.55
  -4   3   8    0.85    1.80
  -3   0  -8   13.22    2.91
   3  -3  -8   17.36    2.47
   0  -3   8   10.37    2.08
  -3   3   8   15.89    2.25
   2  -3  -8    3.57    1.56
  -3   1  -8    4.05    1.58
  -3   1  -8    4.23    2.22
  -1  -2   8    1.05    1.38
  -2   3   8    3.43    1.61
  -1  -2   8    3.22    1.88
  -3   2  -8    1.51    1.58
  -3   2  -8    3.26    2.13
   1  -3  -8    4.40    2.31
   1  -3  -8    2.99    1.41
   3  -2   8    2.16    1.32
  -2  -1   8    4.43    2.39
   0  -3  -8   12.97    2.04
  -3   3  -8   14.29    2.40
   0  -3  -8   13.81    2.28
   3  -3   8   14.21    2.02
  -1  -3  -8    1.92    1.78
   3  -4   8   -0.66    1.30
  -2  -3  -8    3.86    2.51
   3  -5   8    1.88    1.61
  -3  -3  -8    4.60    3.53
   3  -6   8    4.58    2.02
  -4  -3  -8    3.83    3.83
   3  -7   8    1.17    1.94
  -4  -2  -8    1.26    3.88
   2  -6   8   -0.34    1.65
   5  -4  -8   92.80    5.45
  -4  -1  -8   85.07    6.92
  -5   4   8   87.55    5.07
   1  -5   8   95.68    4.75
   4  -4  -8    6.04    2.29
  -4   0  -8    6.47    3.21
  -4   4   8    3.49    2.26
   0  -4   8    4.53    2.03
   3  -4  -8    1.83    1.69
  -4   1  -8    1.38    1.64
  -1  -3   8   -0.20    1.86
   2  -4  -8  175.15    6.55
  -4   2  -8  165.50    6.32
  -4   2  -8  158.92    8.40
  -2  -2   8  165.09    7.58
  -4   3  -8    0.24    1.94
   1  -4  -8    1.64    1.51
   4  -3   8   -0.32    1.33
   0  -4  -8    1.56    1.80
  -4   4  -8    4.16    2.10
  -1  -4  -8   88.76    5.68
   4  -5   8   95.29    5.32
  -2  -4  -8   -0.82    2.78
   4  -6   8    0.29    1.93
  -3  -4  -8    4.21    3.66
   4  -7   8    2.23    2.30
  -5  -2  -8   27.07    6.18
   2  -7   8   31.49    2.81
  -5  -1  -8    1.69    3.94
   1  -6   8    1.37    1.69
   5  -5  -8    4.70    2.38
  -5   0  -8    1.42    3.37
   0  -5   8    1.54    2.13
  -5   1  -8   78.87    6.62
   4  -5  -8   93.83    5.10
  -1  -4   8   77.51    4.87
  -5   2  -8    2.99    1.93
   3  -5  -8    5.53    1.99
  -2  -3   8    8.02    2.77
   2  -5  -8    3.65    1.74
  -5   3  -8    5.97    2.50
  -3  -2   8    6.27    3.12
   1  -5  -8   85.48    4.84
  -5   4  -8   86.01    5.68
   0  -5  -8    1.47    2.17
  -1  -5  -8   -0.21    2.48
  -2  -5  -8   25.62    4.14
   5  -7   8   35.88    4.33
  -6  -1  -8   -0.29    4.78
   1  -7   8    0.14    1.43
  -6   0  -8    2.99    4.47
   0  -6   8    2.28    1.86
   5  -6  -8    3.80    2.64
  -1  -5   8    1.64    2.43
   4  -6  -8    1.08    2.18
  -6   2  -8    0.63    1.96
   3  -6  -8    4.81    2.11
  -6   4  -8    1.74    2.71
  -4  -2   8    0.61    3.27
  -6   5  -8    0.18    3.17
   1  -6  -8    1.72    2.31
   0  -6  -8    2.20    2.40
   6  -7   8    0.18    2.79
  -1  -6   8    1.11    1.85
  -2  -5   8   28.12    3.68
  -7   3  -8    1.68    2.31
   2  -7  -8   26.31    3.68
   0   0  -9   -0.50    1.48
   0   0  -9    2.21    1.32
   0   0   9   -0.09    1.39
  -1   0  -9   -0.30    1.09
   0   1  -9   -1.26    1.72
   1  -1  -9    0.80    1.37
  -1   0  -9    0.27    1.63
  -1   1   9    0.31    1.67
   0  -1   9    0.75    1.45
   1   0   9   -0.69    0.97
   0  -1  -9    0.95    1.76
  -1   1  -9   -0.56    1.76
   0  -1  -9    0.22    0.98
  -1   1  -9    1.05    1.36
   0  -1  -9   -0.27    1.33
   1   0  -9    0.95    1.60
   1  -1   9   -0.49    1.17
   0   1   9   -0.60    1.07
  -1   0   9    0.71    1.72
  -1   2  -9   21.61    2.97
   2  -1  -9   29.38    3.06
  -1  -1  -9   26.44    3.18
  -2   1   9   24.13    3.09
   1  -2   9   23.22    2.74
   3  -2  -9    2.14    1.62
  -2  -1  -9    2.37    2.07
   1  -3   9    1.70    1.55
  -2   0  -9    1.84    2.02
   2  -2  -9   -0.91    0.80
   2  -2  -9    0.34    1.45
  -2   0  -9   -1.81    1.18
   2   0   9   -0.01    0.93
   0  -2   9    0.40    1.49
  -2   2   9   -0.31    1.75
   0  -2   9   -1.42    1.58
  -2   1  -9   24.52    2.56
   1  -2  -9   25.05    2.75
  -2   1  -9   21.74    3.26
   2  -1   9   26.80    2.46
  -1  -1   9   25.04    3.39
  -2   2  -9    0.60    1.53
   0  -2  -9   -0.24    1.67
  -2   2  -9   -1.09    1.84
   2   0  -9    0.00    1.71
   0  -2  -9    0.18    1.41
  -2   0   9   -0.81    1.90
   2  -2   9   -0.66    1.14
  -2   3  -9    0.57    1.73
  -1  -2  -9    1.97    1.69
   3  -1  -9    2.14    1.68
   2  -3   9    1.66    1.41
  -3   1   9    4.20    2.48
  -2  -2  -9   10.77    2.69
   2  -4   9   11.00    2.02
  -3  -2  -9   -1.06    2.69
   2  -5   9    1.46    1.64
   4  -3  -9    1.61    1.79
  -3  -1  -9    1.44    2.50
  -4   3   9    1.55    1.80
   1  -4   9    0.95    1.65
   3  -3  -9   -0.11    1.61
  -3   0  -9   -1.37    2.06
  -3   3   9    0.91    1.65
   0  -3   9    1.06    1.70
  -3   1  -9    0.76    2.15
   2  -3  -9    1.43    1.59
  -3   1  -9    1.89    1.55
  -1  -2   9    2.03    1.87
  -2   3   9    2.07    1.65
  -3   2  -9    3.44    2.38
   1  -3  -9    2.08    1.51
  -3   2  -9    3.47    1.73
  -2  -1   9    1.41    2.30
   3  -2   9    3.22    1.45
   0  -3  -9   -0.63    1.52
  -3   3  -9    0.60    1.85
   3  -3   9   -0.44    1.32
  -3   0   9   -0.60    2.47
  -1  -3  -9    0.28    1.88
  -4   1   9    2.97    2.99
   3  -4   9    0.06    1.46
  -2  -3  -9    0.01    2.46
   3  -5   9    0.03    1.61
  -3  -3  -9   -0.43    3.26
   3  -6   9    1.55    1.90
  -4  -3  -9   -2.89    3.45
   3  -7   9    0.86    2.05
  -4  -2  -9   -2.21    3.85
   2  -6   9    0.43    1.82
   5  -4  -9    6.09    2.50
  -4  -1  -9    5.28    3.67
   1  -5   9    2.24    1.92
  -5   4   9    3.90    2.43
   4  -4  -9   -0.97    1.98
  -4   0  -9    3.35    2.89
   0  -4   9   -0.64    1.90
  -4   4   9    0.22    2.19
  -4   1  -9   -0.69    2.54
  -4   1  -9    1.10    1.61
   3  -4  -9    1.34    1.82
  -1  -3   9    1.30    2.05
   2  -4  -9   11.85    2.18
  -4   2  -9    7.03    2.12
  -2  -2   9   10.69    2.89
   1  -4  -9   -0.47    1.55
  -4   3  -9   -0.15    1.90
  -3  -1   9    1.96    2.89
   4  -3   9    1.79    1.63
  -4   4  -9   -0.69    1.89
   0  -4  -9    0.06    1.87
   4  -4   9    0.60    1.64
  -1  -4  -9    3.75    2.40
   4  -5   9    4.19    2.02
  -2  -4  -9    1.03    2.91
   4  -6   9   -0.45    1.96
  -3  -4  -9   -1.24    3.60
   4  -7   9   -1.95    2.03
  -5  -2  -9    3.44    4.59
   2  -7   9    3.08    1.84
  -5  -1  -9    6.20    4.30
   1  -6   9    0.44    1.81
  -5   0  -9    2.27    3.42
   5  -5  -9    0.12    2.41
   0  -5   9   -1.23    2.07
   4  -5  -9    5.19    2.42
  -5   1  -9    7.02    3.41
  -1  -4   9    3.88    2.24
   3  -5  -9   -0.82    1.80
  -5   2  -9   -2.05    1.81
  -5   3  -9    1.58    2.28
   2  -5  -9   -1.37    1.67
  -3  -2   9    1.74    3.00
  -5   4  -9    5.36    2.87
   1  -5  -9    4.48    2.20
  -4  -1   9    4.69    3.63
   0  -5  -9   -2.73    2.22
  -1  -5  -9    2.63    2.89
   5  -6   9    1.17    2.20
  -2  -5  -9    2.71    3.40
   5  -7   9    2.84    2.64
  -6   0  -9    0.81    4.27
   0  -6   9   -0.04    1.97
   5  -6  -9    2.09    2.75
  -1  -5   9   -0.88    2.35
   4  -6  -9    0.40    2.25
  -6   2  -9    0.29    1.88
   3  -6  -9    0.62    2.02
  -6   3  -9   -0.95    2.08
  -6   4  -9   -1.03    2.87
  -4  -2   9   -0.36    3.19
  -6   5  -9   -0.06    3.19
   1  -6  -9    1.37    2.50
  -5  -1   9    0.23    3.65
   0  -6  -9   -4.64    2.58
  -2  -5   9    0.65    2.60
  -7   3  -9   -0.38    2.26
   2  -7  -9    0.66    2.91
   0   0 -10    9.96    1.75
   0   0 -10    8.82    2.20
   0   0  10    9.09    1.87
  -1   0 -10   -0.47    1.16
  -1   0 -10    1.33    1.87
   0   1 -10    1.20    2.02
   1  -1 -10    1.02    1.45
   0  -1  10    1.95    1.64
  -1   1  10    1.54    1.80
   1   0  10    1.22    1.18
  -1   1 -10    2.59    2.10
   0  -1 -10   -0.94    1.47
   0  -1 -10    0.51    1.02
   1   0 -10    1.28    1.81
   0  -1 -10   -0.29    1.01
  -1   1 -10    0.61    1.48
   1  -1  10    0.17    1.27
  -1   0  10    0.08    1.79
   0   1  10   -0.44    1.15
   2  -1 -10  167.63    6.83
  -1  -1 -10  146.82    6.82
   1  -2  10  173.29    6.49
  -2   1  10  157.93    7.18
  -2  -1 -10    0.37    2.10
   3  -2 -10    1.40    1.79
   1  -3  10    0.48    1.59
   2  -2 -10    0.88    0.86
  -2   0 -10    2.75    2.14
  -2   0 -10    0.63    1.31
   2  -2 -10    1.03    1.61
   0  -2  10    1.50    1.73
   1  -2 -10  161.27    6.45
  -2   1 -10  156.17    5.42
  -2   1 -10  162.54    7.58
  -1  -1  10  160.45    6.96
   2  -1  10  153.39    5.90
   0  -2 -10    0.51    1.55
  -2   2 -10    1.39    1.67
  -2   0  10   -0.53    2.01
   2  -2  10    0.35    1.32
  -1  -2 -10    1.20    1.82
  -2   3 -10   -0.74    1.74
  -3   1  10    0.54    2.48
   2  -3  10   -1.38    1.24
  -2  -2 -10   79.17    5.55
   2  -4  10   86.91    4.64
  -3  -2 -10    2.96    3.08
   2  -5  10    0.92    1.81
   4  -3 -10    0.15    1.77
  -3  -1 -10    0.34    2.51
   1  -4  10    0.81    1.84
   3  -3 -10    7.10    2.20
  -3   0 -10    6.04    2.81
   0  -3  10    5.65    2.12
  -3   3  10    5.57    1.85
   2  -3 -10   -1.28    1.57
  -3   1 -10    0.39    2.30
  -3   1 -10    1.42    1.53
  -2   3  10    0.75    1.64
   1  -3 -10   -1.27    1.44
  -3   2 -10   -0.07    1.46
  -2  -1  10    1.25    2.36
   3  -2  10    0.84    1.34
  -3   3 -10    7.39    2.30
   0  -3 -10    7.02    2.13
   3  -3  10    5.80    1.82
  -3   0  10   10.74    3.34
  -1  -3 -10    0.86    2.01
  -4   1  10    4.17    3.07
   3  -4  10    0.93    1.56
  -2  -3 -10   -1.42    2.61
   3  -5  10    1.11    1.81
  -3  -3 -10    4.32    3.88
   3  -6  10    6.27    2.28
  -4  -3 -10    0.36    3.87
   3  -7  10    1.95    2.15
  -4  -2 -10    3.15    4.23
   2  -6  10   -1.90    1.86
  -4  -1 -10   47.12    5.89
  -5   4  10   40.25    3.72
   1  -5  10   54.67    4.11
  -4   0 -10    0.91    2.99
   4  -4 -10    1.16    2.20
  -4   4  10    1.71    2.22
   0  -4  10    2.05    2.18
   3  -4 -10    0.46    1.91
  -4   1 -10   -2.83    2.55
  -4   1 -10   -0.13    1.59
  -1  -3  10   -0.35    2.04
  -4   2 -10   73.27    4.51
   2  -4 -10   73.40    4.49
  -2  -2  10   81.07    5.63
  -4   3 -10   -1.29    1.94
  -3  -1  10   -0.77    2.97
   4  -3  10    0.24    1.65
  -4   4 -10   -0.98    1.90
   0  -4 -10    1.54    2.06
   4  -4  10    1.12    1.64
  -4   0  10    3.58    3.43
  -1  -4 -10   40.92    4.76
   4  -5  10   55.70    4.41
  -2  -4 -10   -1.63    2.99
   4  -6  10   -1.11    2.07
  -3  -4 -10    0.21    3.91
   4  -7  10    2.01    2.45
  -5  -2 -10   15.85    5.56
   2  -7  10   16.73    2.64
  -5  -1 -10    2.15    4.04
   1  -6  10    0.32    1.92
   5  -5 -10   -0.07    2.58
  -5   0 -10   -0.47    3.20
   0  -5  10   -0.48    2.21
   4  -5 -10   46.59    4.09
  -5   1 -10   36.60    5.54
  -1  -4  10   42.48    4.16
  -5   2 -10   -0.90    1.85
   3  -5 -10    1.77    2.01
  -5   3 -10   -0.52    2.25
  -3  -2  10    0.80    3.10
   1  -5 -10   46.53    4.38
  -5   4 -10   47.65    5.09
  -4  -1  10   54.42    6.17
   0  -5 -10    0.17    2.47
  -5   0  10    1.44    3.68
   5  -5  10    2.78    2.16
  -1  -5 -10    1.61    2.98
   5  -6  10    0.67    2.21
  -2  -5 -10   16.87    4.31
   5  -7  10   21.33    4.15
  -6   0 -10    3.35    4.65
   0  -6  10    4.47    2.30
   5  -6 -10   -0.45    2.59
  -1  -5  10    1.20    2.55
   4  -6 -10   -1.21    2.32
  -6   2 -10   -1.70    1.80
  -6   3 -10    5.09    2.35
  -6   4 -10    2.03    3.01
  -4  -2  10   -1.86    3.27
   1  -6 -10   -0.57    2.67
  -6   5 -10    1.68    3.19
   0  -6 -10    2.73    2.94
  -2  -5  10   13.79    3.23
  -7   3 -10    1.66    2.28
   2  -7 -10   17.52    3.87
   0   0 -11    1.15    1.85
   0   0 -11    2.32    1.54
   0   0  11    1.82    1.67
   1  -1 -11   -0.85    1.57
   1  -1 -11   -1.92    2.44
   0   1 -11    0.19    2.17
  -1   0 -11    0.52    1.97
  -1   0 -11    0.08    1.24
  -1   1  11    0.78    1.87
   0  -1  11    0.96    1.67
   1   0  11   -0.73    1.20
   0  -1 -11   -0.87    1.65
   0  -1 -11   -0.36    1.13
  -1   1 -11   -1.83    1.94
  -1   1 -11   -1.88    1.39
   1   0 -11    0.53    1.89
   1  -1  11    1.52    1.52
  -1   0  11   -0.46    1.88
  -1   2 -11   52.44    3.92
   2  -1 -11   38.83    3.75
  -1  -1 -11   39.99    3.91
   1  -2  11   49.04    3.50
  -2   1  11   43.38    4.54
  -2  -1 -11    1.44    2.30
   3  -2 -11    0.04    1.82
   1  -3  11    1.81    1.80
  -2   0 -11   -0.31    2.19
   2  -2 -11   -0.11    2.62
   2  -2 -11    1.76    1.90
  -2   0 -11    0.43    1.34
   0  -2  11   -0.57    1.83
   1  -2 -11   39.14    2.18
   1  -2 -11   42.31    3.50
  -2   1 -11   42.69    3.20
  -2   1 -11   41.62    4.54
  -1  -1  11   45.58    4.25
   2  -1  11   39.66    3.01
   0  -2 -11    0.69    1.81
  -2   2 -11   -0.28    1.71
   2  -2  11    0.71    1.42
  -2   0  11   -0.40    2.21
  -1  -2 -11    1.70    2.06
  -2   3 -11    2.79    1.98
  -3   1  11    2.37    2.66
   2  -3  11    0.66    1.56
  -2  -2 -11   18.12    3.49
   2  -4  11   18.54    2.70
  -3  -2 -11    0.34    3.16
   2  -5  11    0.38    1.90
   4  -3 -11    0.61    1.96
  -3  -1 -11    1.20    2.76
   1  -4  11   -0.53    1.88
   3  -3 -11   -0.46    2.02
  -3   0 -11   -0.02    2.51
   0  -3  11   -0.59    1.90
  -3   1 -11    2.82    2.70
  -3   1 -11   -0.78    1.48
   2  -3 -11    3.25    2.06
   1  -3 -11    2.51    1.90
  -3   2 -11    1.15    1.55
  -2  -1  11    2.95    2.58
   3  -2  11    0.45    1.41
   0  -3 -11   -0.14    1.89
  -3   3 -11    0.24    2.02
  -3   0  11    1.79    2.97
   3  -3  11    0.17    1.48
  -1  -3 -11    0.55    2.21
  -4   1  11   -0.57    3.00
   3  -4  11    1.12    1.65
  -2  -3 -11    0.59    2.85
   3  -5  11    1.19    1.93
  -3  -3 -11   -0.50    3.76
   3  -6  11   -0.31    1.98
  -4  -3 -11   -0.37    3.89
   3  -7  11   -1.22    2.16
  -4  -2 -11    3.94    4.52
   2  -6  11    0.25    2.15
  -4  -1 -11   12.42    4.40
   1  -5  11   13.49    2.85
  -4   0 -11    0.30    3.08
   4  -4 -11   -1.04    2.24
  -4   4  11    2.12    2.20
   0  -4  11    0.60    2.20
  -4   1 -11   -3.50    2.64
   3  -4 -11    0.95    2.17
  -4   1 -11    0.39    1.65
  -1  -3  11   -0.16    2.24
   2  -4 -11   16.03    2.86
  -4   2 -11   17.58    2.64
  -2  -2  11   20.83    3.65
  -4   3 -11   -0.35    2.11
  -3  -1  11    0.59    2.99
  -4   4 -11   -1.88    1.96
   0  -4 -11   -0.25    2.29
  -4   0  11   -2.97    3.11
   4  -4  11    0.12    1.73
  -1  -4 -11    9.83    3.32
   4  -5  11   15.36    2.96
  -2  -4 -11    0.34    3.33
   4  -6  11    2.67    2.29
  -3  -4 -11   -2.67    3.94
   4  -7  11   -2.14    2.36
  -5  -2 -11   14.89    5.75
   2  -7  11    2.40    2.11
  -5  -1 -11    5.80    4.17
   1  -6  11    3.09    2.22
  -5   0 -11   -2.27    3.18
   0  -5  11   -3.23    2.12
   4  -5 -11   10.57    3.02
  -1  -4  11    9.55    3.02
  -5   2 -11   -0.29    1.93
   3  -5 -11    2.77    2.34
  -5   3 -11    2.59    2.42
  -3  -2  11    2.38    3.32
  -5   4 -11    6.28    2.90
   1  -5 -11   12.86    3.11
  -4  -1  11   10.05    4.41
   0  -5 -11   -0.65    2.64
  -1  -5 -11    6.79    3.48
   5  -6  11    4.39    2.65
  -2  -5 -11    6.06    4.06
   5  -7  11    3.03    2.98
   0  -6  11   -0.74    2.12
  -1  -5  11    3.18    2.65
   4  -6 -11    2.50    2.73
  -6   3 -11   -1.60    2.15
  -6   4 -11    4.55    3.12
   1  -6 -11    3.69    3.06
  -6   5 -11    2.92    3.46
   0  -6 -11    3.54    3.21
  -2  -5  11    2.91    2.91
  -7   3 -11   -1.71    2.20
   2  -7 -11    1.65    3.41
   0   0 -12  258.24    7.75
   0   0 -12  254.74    9.95
   0   0  12  247.78    9.16
  -1   0 -12    0.23    1.30
  -1   0 -12    1.85    2.23
   1  -1 -12   -0.96    1.81
   1  -1 -12    2.22    2.76
   0  -1  12   -0.29    1.72
  -1   1 -12    0.26    1.62
  -1   1 -12    2.86    2.41
   0  -1 -12    1.93    2.00
   0  -1 -12    0.87    1.27
   1   0 -12   -0.82    1.91
  -1   0  12    0.60    2.12
   1  -1  12    0.87    1.55
  -1  -1 -12   62.39    4.81
   2  -1 -12   62.88    4.64
  -1   2 -12   80.47    4.80
  -2   1  12   69.05    5.15
   1  -2  12   72.47    4.43
  -2  -1 -12    1.51    2.56
   3  -2 -12    0.18    1.94
   1  -3  12   -0.64    1.79
  -2   0 -12   -0.42    1.33
  -2   0 -12    2.01    2.44
   2  -2 -12    0.53    2.04
   2  -2 -12   -1.20    2.71
   0  -2  12   -1.82    1.80
  -2   1 -12   68.92    5.75
   1  -2 -12   71.10    4.61
  -2   1 -12   62.92    3.84
  -1  -1  12   70.97    5.10
   2  -1  12   74.26    4.12
   0  -2 -12    0.87    1.88
  -2   2 -12   -0.79    1.81
   2  -2  12   -0.80    1.44
  -2   0  12   -0.06    2.39
  -2   3 -12   -1.25    1.93
  -1  -2 -12    1.77    2.16
  -3   1  12    0.90    2.61
   2  -3  12    0.44    1.56
  -2  -2 -12   37.54    4.72
   2  -4  12   49.60    4.08
  -3  -2 -12    0.39    3.36
   2  -5  12    0.02    1.98
  -3  -1 -12    2.22    2.98
   1  -4  12    2.26    2.25
   3  -3 -12   84.60    5.32
  -3   0 -12   68.53    5.70
   0  -3  12   79.75    5.06
  -3   1 -12    1.12    2.65
   2  -3 -12   -1.46    1.96
  -3   1 -12    2.62    1.66
  -3   2 -12    1.49    1.65
  -3   3 -12   84.27    5.28
   0  -3 -12   75.20    5.16
   3  -3  12   96.43    5.08
  -3   0  12   87.78    6.58
  -1  -3 -12   -1.30    2.29
   3  -4  12   -0.33    1.63
  -2  -3 -12    1.19    3.14
   3  -5  12    0.21    1.99
  -3  -3 -12   22.44    5.20
   3  -6  12   28.53    3.87
  -4  -3 -12   -0.48    4.09
   3  -7  12   -1.99    2.38
  -4  -2 -12   -2.45    4.14
   2  -6  12   -0.25    2.21
  -4  -1 -12   21.80    4.81
   1  -5  12   20.01    3.28
   4  -4 -12   -0.73    2.51
  -4   0 -12    2.01    3.15
   0  -4  12   -0.39    2.38
  -4   1 -12   -0.28    1.66
   3  -4 -12    3.24    2.56
  -4   2 -12   43.89    4.14
  -4   3 -12   -0.62    2.13
   1  -4 -12   -0.02    2.19
  -3  -1  12    1.89    3.25
  -4   4 -12    0.60    2.12
   0  -4 -12    1.71    2.53
   4  -4  12    0.73    2.00
  -4   0  12    2.34    3.37
  -1  -4 -12   20.53    4.02
   4  -5  12   26.18    3.67
  -2  -4 -12    2.89    3.81
   4  -6  12    0.06    2.28
  -3  -4 -12   -1.30    3.48
   4  -7  12    0.24    2.73
  -5  -1 -12   -2.53    3.84
   1  -6  12    1.19    2.24
  -5   0 -12   -2.37    3.86
   0  -5  12    0.01    2.46
   4  -5 -12   26.31    4.03
  -1  -4  12   18.39    3.55
  -5   2 -12   -1.31    1.86
   3  -5 -12   -0.44    2.44
  -5   3 -12   -3.19    2.21
   1  -5 -12   16.80    3.50
  -5   4 -12   17.53    3.39
   0  -5 -12    0.45    2.97
  -1  -5 -12    1.49    3.43
   5  -6  12    2.14    2.57
   0  -6  12    8.54    2.71
  -1  -5  12    1.64    2.76
  -6   3 -12   10.86    2.80
  -6   4 -12   -2.16    2.94
   1  -6 -12   -0.49    3.00
  -6   5 -12    2.57    3.48
   0  -6 -12   15.94    4.11
   0   0 -13    1.69    2.19
   0   0 -13    3.58    1.85
   0   0  13    1.90    1.83
  -1   0 -13   -1.46    2.16
  -1   0 -13    0.38    1.40
   1  -1 -13   -1.07    1.96
   1  -1 -13   -0.03    2.81
   0  -1  13    0.68    2.06
   0  -1 -13    0.31    1.34
   0  -1 -13   -0.71    2.04
  -1   1 -13   -0.42    1.68
  -1   0  13    0.55    2.12
   1  -1  13    1.12    1.71
  -1  -1 -13   33.63    4.11
  -1   2 -13   30.11    3.29
   1  -2  13   31.23    3.61
  -2  -1 -13    1.81    2.71
   1  -3  13    2.52    2.10
   2  -2 -13    0.47    2.99
  -2   0 -13   -0.47    2.39
   2  -2 -13   -2.36    2.06
  -2   0 -13    0.14    1.43
   0  -2  13   -0.27    2.03
   1  -2 -13   30.82    3.71
  -2   1 -13   24.76    4.25
  -2   1 -13   25.63    2.68
  -1  -1  13   35.47    4.37
   0  -2 -13   -2.30    1.96
  -2   2 -13   -0.75    1.84
  -2   0  13    0.04    2.46
   2  -2  13    0.37    1.67
  -2   3 -13    3.10    2.25
  -1  -2 -13    2.06    2.44
   2  -3  13    3.50    1.85
  -2  -2 -13    8.54    3.34
   2  -4  13   14.73    2.80
  -3  -2 -13    0.82    3.51
   2  -5  13    1.34    2.24
  -3  -1 -13   -2.16    2.91
   1  -4  13    0.12    2.26
   3  -3 -13    1.58    2.57
  -3   0 -13    2.35    2.87
   0  -3  13    2.62    2.35
  -3   1 -13    2.01    1.66
  -1  -2  13    1.70    2.51
  -3   2 -13    3.65    1.79
  -3   3 -13   -1.13    2.17
  -3   0  13    1.61    2.91
   3  -3  13   -0.87    1.67
  -1  -3 -13    1.97    2.80
   3  -4  13   -0.45    1.78
  -2  -3 -13   -0.23    3.24
   3  -5  13    2.30    2.25
  -3  -3 -13   -1.81    4.00
   3  -6  13    1.01    2.48
  -4  -2 -13    1.09    3.82
   2  -6  13    0.81    2.52
  -4  -1 -13   11.56    4.45
   1  -5  13    5.94    2.68
  -4   0 -13    0.88    3.41
   0  -4  13   -1.28    2.28
  -4   1 -13    1.74    1.77
  -4   2 -13   11.56    2.46
   1  -4 -13    2.82    2.56
  -4   3 -13    2.02    2.33
   0  -4 -13    0.63    2.75
  -4   4 -13   -0.80    2.14
  -1  -4 -13    6.47    3.54
   4  -5  13    4.51    2.40
  -2  -4 -13    3.97    3.95
   4  -6  13    1.24    2.49
  -5  -1 -13   -1.78    3.96
   1  -6  13    3.42    2.56
  -5   0 -13   -4.09    4.10
   0  -5  13   -3.22    2.34
  -1  -4  13    5.80    2.86
  -5   2 -13    0.78    2.03
  -5   3 -13    0.84    2.47
  -5   4 -13    7.03    3.07
   1  -5 -13    5.69    3.27
   0  -5 -13    0.41    3.19
  -1  -5 -13   -1.62    3.51
  -1  -5  13   -0.63    2.73
  -2  -4  13    0.97    3.01
  -6   3 -13    0.85    2.36
  -6   4 -13    1.00    3.04
   1  -6 -13   -0.98    3.37
  -6   5 -13   -1.88    3.42
   0   0 -14   81.58    4.51
   0   0 -14   83.70    5.95
   1  -1 -14   -0.05    2.17
   1  -1 -14    0.23    2.91
   0   1 -14   -1.31    1.80
  -1   0 -14   -0.75    1.47
  -1   0 -14   -0.73    2.44
   0  -1  14   -0.89    1.92
   0  -1 -14    0.27    2.25
  -1   1 -14   -1.12    1.70
   0  -1 -14    0.04    1.43
   1  -1  14   -0.19    1.72
  -1   0  14   -1.94    2.16
  -1  -1 -14   15.27    3.41
  -1   2 -14   12.16    2.71
   1  -2  14   12.80    2.59
  -2  -1 -14    0.48    2.83
   1  -3  14    0.41    1.90
   2  -2 -14   -1.64    3.04
   2  -2 -14    0.42    2.38
  -2   0 -14    0.98    1.49
  -2   0 -14    0.62    2.72
   0  -2  14   -0.64    2.12
  -2   1 -14   12.41    2.23
   1  -2 -14   15.39    3.17
  -1  -1  14   15.47    3.30
   0  -2 -14    2.50    2.45
  -2   2 -14   -0.69    1.88
   2  -2  14    0.05    1.71
  -2   0  14    0.01    2.54
  -2   3 -14   -3.19    2.06
  -1  -2 -14   -0.94    2.41
   2  -3  14   -0.62    1.71
  -2  -2 -14   13.38    3.73
   2  -4  14    5.43    2.28
  -3  -2 -14   -0.83    3.77
   2  -5  14    1.04    2.35
  -3  -1 -14   -2.54    3.12
   1  -4  14   -0.93    2.05
   3  -3 -14   70.33    5.49
  -3   0 -14   66.00    6.09
   0  -3  14   73.30    5.41
  -3   1 -14    1.81    1.71
  -1  -2  14    0.94    2.55
  -3   2 -14   -0.22    1.70
  -2  -1  14    2.63    2.95
  -3   3 -14   74.21    5.26
  -3   0  14   72.60    6.41
  -1  -3 -14    1.50    3.12
   3  -4  14    1.39    1.97
  -2  -3 -14    0.16    3.42
   3  -5  14    0.83    2.31
  -3  -3 -14   31.12    6.04
   3  -6  14   45.68    5.16
  -4  -2 -14   -1.58    3.86
   2  -6  14   -1.04    2.59
  -4  -1 -14    7.50    4.32
   1  -5  14    3.85    2.62
  -4   0 -14    6.51    3.94
   0  -4  14    2.01    2.47
  -4   1 -14    1.62    1.78
  -1  -3  14   -2.95    2.57
  -4   2 -14    4.69    2.16
   1  -4 -14   -0.11    2.76
  -4   3 -14    0.79    2.30
  -4   4 -14    2.51    2.54
   0  -4 -14    5.66    3.19
  -1  -4 -14    4.90    3.64
   4  -5  14    5.14    2.52
  -2  -4 -14   -0.58    4.02
   4  -6  14    0.52    2.70
  -5  -1 -14   -1.52    4.10
   1  -6  14    1.96    2.67
   0  -5  14   -0.46    2.68
  -1  -4  14    5.94    3.00
  -5   2 -14    0.72    2.03
  -5   3 -14    1.37    2.51
  -5   4 -14    4.22    2.95
   0  -5 -14   -1.72    3.34
  -1  -5 -14    0.98    3.86
  -1  -5  14   -2.10    2.81
  -2  -4  14    4.08    3.08
  -6   3 -14   23.03    3.53
  -6   4 -14   -2.52    3.01
  -6   5 -14    2.87    3.72
   1  -6 -14    2.25    3.71
   0   0 -15    1.45    1.80
   1  -1 -15   -2.16    1.59
  -1   0 -15   -0.47    2.66
   1  -1 -15   -1.54    2.36
   0   1 -15   -1.34    2.01
  -1   0 -15   -1.55    1.46
   0  -1  15   -0.15    2.06
   0  -1 -15   -0.45    1.47
  -1   1 -15   -1.49    1.82
   0  -1 -15   -0.69    2.27
  -1  -1 -15    4.98    2.83
  -1   2 -15   -2.26    2.06
   1  -2  15    0.10    1.97
  -2  -1 -15   -1.63    2.76
   1  -3  15   -0.58    1.93
  -2   0 -15   -0.24    1.51
   2  -2 -15    0.83    2.84
  -2   0 -15    2.95    3.14
   2  -2 -15   -0.52    2.51
   0  -2  15    0.34    2.34
   1  -2 -15   -0.14    2.46
  -2   1 -15   -1.17    1.54
  -1  -1  15    1.08    2.39
  -2   2 -15    2.98    2.18
   0  -2 -15    0.42    2.55
  -1  -2 -15    0.92    2.72
  -2   3 -15   -1.24    2.25
   2  -3  15    1.28    1.91
  -2  -2 -15    1.73    3.39
   2  -4  15    0.84    2.04
  -3  -2 -15    0.16    3.95
   2  -5  15   -1.40    2.26
  -3  -1 -15   -0.49    3.39
   1  -4  15   -0.45    2.11
   3  -3 -15   -1.46    2.83
  -3   0 -15   -0.08    3.25
   0  -3  15   -0.79    2.55
  -3   1 -15    2.42    1.83
  -1  -2  15   -2.46    2.63
  -3   2 -15   -0.26    1.80
   1  -3 -15    1.16    2.78
  -2  -1  15   -0.96    2.60
  -3   3 -15    1.86    2.52
  -1  -3 -15    0.03    3.26
   3  -4  15   -0.34    2.04
  -2  -3 -15    2.43    3.93
   3  -5  15   -1.25    2.25
  -3  -3 -15   -0.96    3.70
   3  -6  15    2.00    2.89
  -4  -2 -15   -0.29    4.04
   2  -6  15   -1.11    2.75
  -4  -1 -15    2.42    4.38
   1  -5  15   -1.79    2.40
   0  -4  15    1.15    2.60
  -4   1 -15   -0.55    1.76
  -1  -3  15    1.60    2.61
  -4   2 -15   -0.48    2.00
  -2  -2  15    2.25    3.07
   1  -4 -15   -1.54    2.86
  -4   3 -15   -0.37    2.39
  -3  -1  15    1.67    3.19
  -4   4 -15   -0.76    2.33
   0  -4 -15   -1.64    3.08
  -1  -4 -15    2.23    3.78
  -2  -4 -15    0.74    3.74
   4  -6  15   -1.45    2.76
   0  -5  15    0.98    2.71
  -1  -4  15   -0.46    2.80
  -5   2 -15    2.68    2.16
  -2  -3  15    0.32    2.98
  -5   3 -15   -0.29    2.51
  -5   4 -15    1.36    2.96
   0  -5 -15    0.05    3.68
  -2  -4  15    1.10    3.20
  -6   3 -15    0.23    2.56
  -6   4 -15    0.24    3.16
   0   0 -16  238.98    8.10
  -1   0 -16    0.94    1.53
   0   1 -16    1.61    2.30
   1  -1 -16    0.65    1.79
   1   0 -16    2.18    2.14
   0  -1 -16    2.28    2.76
   0  -1 -16    1.16    1.41
  -1   1 -16    0.73    1.98
  -1  -1 -16    6.18    3.17
  -1   2 -16    6.65    2.66
   1  -2  16    6.61    2.42
  -2  -1 -16   -0.34    3.13
   1  -3  16   -0.75    2.10
   2  -2 -16   -0.11    2.93
  -2   0 -16   -0.28    1.56
   0  -2  16   -0.40    2.18
  -2   1 -16    8.20    2.24
   1  -2 -16    8.89    3.16
  -1  -1  16    9.80    3.11
   0  -2 -16   -2.29    2.51
  -2   2 -16   -0.83    2.11
  -2   3 -16   -0.89    2.41
  -1  -2 -16   -1.88    2.92
   2  -3  16   -0.26    2.00
  -2  -2 -16    4.27    3.71
   2  -4  16    5.24    2.54
  -3  -2 -16   -0.17    4.13
   2  -5  16   -0.10    2.42
  -3  -1 -16    2.97    3.90
   1  -4  16   -0.92    2.33
   0  -3  16   97.08    6.24
   2  -3 -16    0.12    2.83
  -3   1 -16    0.38    1.86
  -1  -2  16    0.23    2.57
   1  -3 -16    2.57    3.05
  -3   2 -16    1.22    1.96
  -2  -1  16    1.65    2.92
   0  -3 -16   82.02    6.20
  -3   3 -16   90.89    5.90
  -1  -3 -16   -0.67    3.44
  -2  -3 -16    1.18    4.14
   3  -5  16   -1.17    2.41
  -3  -3 -16   27.74    6.46
   3  -6  16   30.94    4.69
  -4  -1 -16    5.00    4.64
   1  -5  16    0.71    2.71
   0  -4  16    1.90    2.71
   3  -4 -16    0.67    3.45
  -1  -3  16    1.93    2.82
  -4   2 -16    3.48    2.30
   2  -4 -16    2.73    3.39
  -2  -2  16    5.73    3.39
   1  -4 -16    3.13    3.48
  -4   3 -16    0.54    2.52
  -3  -1  16    1.68    3.38
   0  -4 -16    2.57    3.60
  -4   4 -16   -0.69    2.41
  -1  -4 -16    1.02    3.51
   0  -5  16    2.43    2.98
  -1  -4  16    2.93    3.16
  -5   2 -16    0.26    2.15
  -2  -3  16   -0.83    3.00
  -5   3 -16    0.32    2.60
  -3  -2  16   -1.09    3.35
  -5   4 -16    2.81    3.19
   0  -5 -16   -1.43    3.46
  -3  -3  16   22.58    5.07
   0   0 -17    1.10    1.97
   0   1 -17   -1.61    2.19
  -1   0 -17    0.54    1.59
   1  -1 -17   -0.79    1.86
   0  -1 -17   -0.44    1.43
   1   0 -17   -0.36    2.20
  -1   1 -17    0.98    2.14
   2  -1 -17   -0.39    3.55
  -1   2 -17    0.31    2.42
  -1  -1 -17    2.22    3.07
   3  -2 -17   -2.99    3.53
  -2  -1 -17   -1.57    3.13
   1  -3  17   -1.29    2.12
   0   2 -17   -0.87    2.30
  -2   0 -17   -1.09    1.63
   2  -2 -17   -1.88    1.69
   0  -2  17    0.33    2.33
  -2   1 -17    1.88    1.79
   1  -2 -17    2.18    3.03
  -2   2 -17    1.38    2.37
   0  -2 -17   -0.89    2.82
  -2   3 -17   -3.08    2.46
  -1  -2 -17   -0.45    3.16
  -2  -2 -17    1.70    3.86
   2  -4  17    0.58    2.26
  -3  -2 -17   -1.81    3.61
   2  -5  17   -0.60    2.56
  -3  -1 -17   -2.65    3.73
   4  -3 -17    1.24    3.41
   1  -4  17    0.72    2.36
   0  -3  17   -0.54    2.77
  -3   1 -17   -0.26    1.87
   2  -3 -17    0.36    3.20
  -1  -2  17   -0.21    2.63
  -3   2 -17   -2.67    2.07
   1  -3 -17   -2.32    2.99
  -3   3 -17    1.89    2.45
   0  -3 -17   -0.97    3.20
  -1  -3 -17   -0.29    3.65
  -2  -3 -17   -1.86    3.43
   3  -5  17    0.18    2.56
   1  -5  17    1.86    2.96
   0  -4  17   -0.64    2.63
   3  -4 -17   -1.77    3.55
  -1  -3  17    0.41    2.83
   2  -4 -17    0.85    3.50
  -4   2 -17    2.42    2.38
  -2  -2  17    0.51    2.94
   1  -4 -17   -2.50    3.22
  -4   3 -17    0.79    2.62
  -4   4 -17   -3.30    2.51
   0  -4 -17    1.85    3.32
  -1  -4 -17    0.08    3.75
  -1  -4  17   -0.21    3.09
  -5   2 -17   -0.60    2.19
   3  -5 -17   -0.20    3.31
  -2  -3  17   -1.58    3.11
   2  -5 -17   -0.16    3.45
  -5   3 -17   -0.90    2.60
  -3  -2  17   -0.58    3.54
  -5   4 -17    1.40    3.16
   1  -5 -17    2.46    3.62
   0   0 -18   14.10    2.88
   1  -1 -18   -0.05    1.97
   0   1 -18   -1.40    2.34
  -1   0 -18    0.60    1.70
   1   0 -18    1.40    2.35
  -1   1 -18   -0.23    2.13
   0  -1 -18    0.29    1.51
  -1   2 -18    5.40    2.86
   2  -1 -18    5.17    2.46
   3  -2 -18   -4.14    3.72
   0   2 -18    1.46    2.60
  -2   0 -18   -0.83    1.72
   2  -2 -18   -1.34    1.81
  -2   1 -18    3.17    1.93
  -2   2 -18   -0.72    2.36
   0  -2 -18   -1.10    3.08
  -2   3 -18   -1.15    2.57
  -1  -2 -18   -2.09    3.31
  -2  -2 -18    2.55    4.07
  -3  -2 -18    1.79    3.96
   2  -5  18   -0.77    2.73
   1  -4  18    0.20    2.53
   0  -3  18   20.01    3.90
  -3   1 -18    0.71    2.06
  -1  -2  18    0.54    2.90
  -3   2 -18   -1.42    2.20
   1  -3 -18   -1.42    3.27
  -3   3 -18   13.75    3.38
   0  -3 -18   18.50    4.53
  -1  -3 -18   -2.43    3.78
  -2  -3 -18    1.50    4.09
   1  -5  18    2.96    3.22
   0  -4  18    0.32    2.78
  -1  -3  18   -1.55    2.85
  -4   2 -18    2.27    2.47
   2  -4 -18    2.69    3.82
  -2  -2  18    3.43    3.44
  -4   3 -18   -1.15    2.60
   1  -4 -18    2.52    3.98
   0  -4 -18   -0.29    3.40
  -4   4 -18    1.26    3.02
  -1  -4 -18    0.51    4.16
  -1  -4  18    0.13    3.16
   3  -5 -18   -3.27    3.32
  -5   2 -18   -1.13    2.23
  -2  -3  18    0.06    3.29
   2  -5 -18    2.07    3.64
  -5   3 -18   -2.11    2.71
  -3  -2  18    3.28    3.95
   1  -5 -18    1.50    3.80
   0   0 -19   -0.20    2.04
  -1   0 -19    1.07    1.72
   0   1 -19    1.24    2.47
   1  -1 -19   -0.64    1.99
   1   0 -19   -1.57    2.36
  -1   1 -19   -0.33    2.22
   0  -1 -19   -1.71    1.49
   2  -1 -19   11.51    3.15
  -1   2 -19    6.26    3.02
   3  -2 -19   -1.58    2.21
   0   2 -19   -0.06    2.63
   2  -2 -19   -0.59    1.75
  -2   1 -19    8.98    2.53
   1   1 -19    8.26    2.96
  -2   2 -19   -0.76    2.57
  -1  -2 -19    3.29    3.82
  -2   3 -19    0.63    2.77
  -2  -2 -19    0.82    4.31
   1  -4  19   -0.12    2.65
  -3   1 -19    2.93    2.20
  -3   2 -19    0.65    2.34
   1  -3 -19    0.67    3.69
  -3   3 -19   -2.61    2.44
   0  -3 -19    0.60    3.81
  -1  -3 -19    3.32    3.78
   0  -4  19   -1.69    2.80
  -1  -3  19   -3.25    2.90
  -4   2 -19    7.39    2.82
   2  -4 -19    4.34    4.28
   1  -4 -19    3.47    3.76
  -4   3 -19   -0.58    2.75
   0  -4 -19   -0.53    3.68
  -4   4 -19    2.38    3.23
   0   0 -20   19.48    3.25
  -1   0 -20    0.16    1.76
   0   1 -20    2.56    2.77
   1  -1 -20    0.04    2.05
  -1   1 -20    0.72    2.38
   0  -1 -20    0.12    1.74
   1   0 -20    0.91    2.53
   2  -1 -20   12.74    3.25
  -1   2 -20    9.30    3.21
   3  -2 -20   -0.55    2.38
   0   2 -20   -1.96    2.65
   1   1 -20   15.49    3.90
  -2   1 -20    9.73    2.63
   2   0 -20   -1.01    2.57
  -2   2 -20   -0.23    2.68
  -2   3 -20   -1.87    2.70
   3  -1 -20    1.23    2.64
   4  -2 -20    3.04    2.89
  -3   1 -20    2.34    2.27
  -3   2 -20   -0.31    2.46
  -3   3 -20    4.91    2.88
   0  -3 -20    2.80    4.07
  -3   4 -20   -0.41    3.22
  -1  -3 -20    0.96    3.93
  -4   2 -20    7.52    2.81
  -4   3 -20   -0.25    2.83
   1  -4 -20   -1.33    3.56
   0   0 -21    2.81    2.22
   1  -1 -21   -0.98    2.18
  -1   0 -21    0.70    2.04
   0   1 -21   -1.01    2.65
  -1   1 -21   -2.79    2.30
   1   0 -21    0.58    2.53
  -1   2 -21    6.21    3.15
   2  -1 -21   -0.39    2.39
   3  -2 -21   -0.90    2.36
   0   2 -21   -1.50    2.92
  -2   1 -21    2.36    2.33
   1   1 -21   -1.56    2.80
  -2   2 -21    1.52    2.52
   2   0 -21   -1.63    2.73
   3  -1 -21   -4.49    2.54
  -2   3 -21    0.59    3.08
  -3   1 -21   -0.23    2.33
  -3   2 -21   -0.05    2.50
  -3   3 -21   -2.58    2.58
   0   0 -22    2.21    2.56
   0   1 -22   -2.04    2.67
   1  -1 -22   -0.78    2.27
  -1   0 -22   -0.54    2.16
   1   0 -22   -2.88    2.42
  -1   1 -22    1.52    2.70
  -1   2 -22    8.42    3.24
   2  -1 -22    7.26    2.86
   0   2 -22    1.03    3.17
  -2   1 -22    8.08    2.69
   1   1 -22   10.97    3.57
  -2   2 -22   -1.94    2.44
   2   0 -22   -1.13    2.78
   0   0 -23   -2.30    2.17
   0   1 -23   -2.31    2.65
   1  -1 -23   -0.30    2.10
  -1   0 -23   -0.09    2.21
   1   0 -23   -0.78    2.55
  -1   1 -23   -1.09    2.34
   0   0   0    0.00    0.00
;
_shelx_hkl_checksum   93411
